1 **Pancreatic islet chromatin accessibility and conformation**  
2 **defines distal enhancer networks of type 2 diabetes risk**

3

4 William W Greenwald<sup>1,10</sup>, Joshua Chiou<sup>2,10</sup>, Jian Yan<sup>3,4,10</sup>, Yunjiang Qiu<sup>1,3,10</sup>, Ning Dai<sup>5</sup>,  
5 Allen Wang<sup>7</sup>, Naoki Nariai<sup>6</sup>, Anthony Aylward<sup>1</sup>, Jee Yun Han<sup>7</sup>, Nikita Kadakia<sup>6</sup>, Laura  
6 Barrufet<sup>5</sup>, Mei-Lin Okino<sup>6</sup>, Frauke Drees<sup>6</sup>, Nicholas Vinckier<sup>6</sup>, Liliana Minichiello<sup>8</sup>, David  
7 Gorkin<sup>7</sup>, Joseph Avruch<sup>5</sup>, Kelly Frazer<sup>6,11</sup>, Maike Sander<sup>6,9,11</sup>, Bing Ren<sup>3,7,9,11</sup>, Kyle J  
8 Gaulton<sup>6,11,#</sup>

9

10 1. Bioinformatics and Systems Biology Graduate Program, UC San Diego, La Jolla CA

11 2. Biomedical Sciences Graduate Program, UC San Diego, La Jolla CA

12 3. Ludwig Institute for Cancer Research, La Jolla CA

13 4. Department of Medical Biochemistry and Biophysics, Division of Functional  
14 Genomics and Systems Biology, Karolinska Institutet, Stockholm, Sweden

15 5. Department of Molecular Biology, Harvard University, Cambridge MA

16 6. Department of Pediatrics, UC San Diego, La Jolla CA

17 7. Center for Epigenomics, UC San Diego, La Jolla CA

18 8. Department of Pharmacology, University of Oxford, Oxford UK OX1 3QT

19 9. Department of Cellular and Molecular Medicine, UC San Diego, La Jolla CA

20 10. Authors contributed equally to this work

21 11. Authors jointly supervised this work

22

23 # Corresponding author: [kgaulton@ucsd.edu](mailto:kgaulton@ucsd.edu)

24

25

26

27

28

29

30

31

32

33

34

35 **Abstract**

36

37 The gene targets of enhancer activity in pancreatic islets are largely unknown, impeding  
38 discovery of islet regulatory networks involved in type 2 diabetes (T2D) risk. We  
39 mapped chromatin state, accessibility and conformation using ChIP-seq, ATAC-seq and  
40 Hi-C in human pancreatic islets, which we integrated with T2D genetic fine-mapping and  
41 islet expression QTL data. Active islet regulatory elements preferentially interacted with  
42 other active elements, often at distances over 1MB, and we identified target genes for  
43 thousands of distal islet enhancers. A third of T2D risk signals mapped in islet  
44 enhancers, and target genes regulated by these signals were specifically involved in  
45 processes related to protein transport and secretion. Among implicated target genes of  
46 T2D islet enhancer signals with no prior known role in islet function, we demonstrated  
47 that reduced *IGF2BP2* activity in mouse islets leads to impaired glucose-stimulated  
48 insulin secretion. These results link distal islet enhancer regulation of protein secretion  
49 and transport to genetic risk of T2D, and highlight the utility of high-throughput chromatin  
50 conformation maps to uncover the gene regulatory networks of complex disease.

51

52 **Introduction**

53

54 Genetic risk of type 2 diabetes (T2D) is largely mediated through variants affecting  
55 transcriptional regulatory activity in pancreatic islets<sup>1-7</sup>. Genetic fine-mapping combined  
56 with epigenomic annotation data can identify causal variants at T2D risk loci mapping in  
57 islet regulatory elements<sup>1,2</sup>. The gene targets of islet regulatory elements, however, are  
58 largely unknown, impeding discovery of disease-relevant gene networks perturbed by  
59 risk variants and novel therapeutic avenues. The spatial organization of chromatin plays  
60 a critical role in tissue-specific gene regulation, and recently developed high-throughput  
61 techniques such as Hi-C identify physical relationships between genomic regions in  
62 human tissues genome-wide<sup>8-10</sup>. Tissue-specific maps of chromatin organization can  
63 identify candidate target genes of distal regulatory elements and inform the molecular  
64 mechanisms of disease risk variants<sup>9</sup>.

65

66 Here, we defined the spatial organization of transcriptional regulatory elements in  
67 primary pancreatic islets, through which we mapped genetic effects on islet gene  
68 expression and T2D risk. Islet active regulatory elements preferentially interacted with

69 other active elements, in many cases over 1MB, and we identified putative distal target  
70 genes for thousands of islet enhancers. A third of known T2D risk signals had likely  
71 causal variants in islet enhancers, and target genes of these signals were strongly  
72 enriched for processes related to protein secretion and transport. Among target genes  
73 with no previously known role in islet function, we demonstrated that reduced activity of  
74 *IGF2BP2* in mouse islets leads to impaired glucose-stimulated insulin secretion.  
75 Together our results define distal regulatory programs in islets through which we link  
76 islet enhancer regulation of protein transport and secretion to T2D risk.

77

## 78 **Results**

79

80 We first defined islet accessible chromatin using ATAC-seq<sup>11</sup> generated from four  
81 pancreatic islet samples (**Table S1**). Accessible chromatin signal was highly concordant  
82 across all samples (Pearson  $r^2 > .8$ ) (**Figure S1**). We called sites for each sample  
83 separately using MACS2<sup>12</sup>, and merged sites to create a combined set of 105,734 islet  
84 accessible chromatin sites. We then collected published ChIP-seq data of histone  
85 modification and transcription factor binding in primary islets<sup>5,13</sup> and called chromatin  
86 states using ChromHMM<sup>14</sup> (**Figure S1**). Accessible chromatin predominantly mapped  
87 within active enhancer and promoter states (**Figure 1A**). We functionally annotated islet  
88 accessible chromatin by using chromatin states to define active enhancers and  
89 promoters, as well as other classes of islet regulatory elements (**Table S2**). We identified  
90 44,860 active enhancers which, in line with previous reports<sup>4,15</sup>, were distal to promoters,  
91 more tissue-specific, and preferentially harbored motifs for FOXA, RFX, NEUROD and  
92 other islet transcription factors (**Figure S1, Table S3**). These results define active  
93 enhancers and other classes of regulatory elements in pancreatic islets.

94

95 Defining the target genes of enhancers has been challenging as they frequently control  
96 non-adjacent genes over large genomic distances through chromatin looping<sup>16</sup>. The  
97 spatial organization of chromatin in pancreatic islets is unknown, and we therefore  
98 identified physical interactions between genomic regions in islets. We performed  
99 genome-wide chromatin conformation capture using *in situ* Hi-C<sup>8,17</sup> in three islet  
100 samples, two of which were sequenced to a depth of >1 billion reads (**Table S1**).  
101 Contact matrices from islet Hi-C assays were highly concordant across samples (**Figure**  
102 **S2**). We called chromatin loops at 5kb, 10kb, and 25kb resolution with HICCUPS<sup>8</sup> using

103 reads from each sample individually, as well as with reads pooled from all three samples  
104 (**Figure 1B**). We then merged loops across samples where both anchors overlapped at  
105 20kb resolution (**see Methods**), resulting in a combined set of 11,924 islet Hi-C loops  
106 (**Table S4**). The median distance between loop anchor midpoints was 255kb, and  
107 nearly 10% were over 1MB in size (**Figure S2**). This established a map of chromatin  
108 loops in human pancreatic islets.

109

110 We determined the relationship between islet regulatory element activity and chromatin  
111 looping. Islet accessible chromatin signal was largely localized to islet loop anchors,  
112 with the strongest signal at anchor midpoints (**Figure 1C**). Nearly half of all islet  
113 regulatory elements were proximal to an anchor (48.7%), and regulatory sites most  
114 enriched (empirical  $P < 1.5 \times 10^{-4}$ ) for chromatin loop anchors included CTCF binding sites  
115 (2.61-fold), active promoters (2.08-fold), and active enhancers (1.85-fold) (**Figure 1D**).  
116 We further mapped the relationship between islet regulatory sites connected by loop  
117 anchors. The most significantly enriched anchor interactions were between active  
118 enhancer and promoter sites (EnhA1-TssA OR=1.28,  $P=1.53 \times 10^{-37}$ ; EnhA1-EnhA1  
119 OR=1.37,  $P=1.87 \times 10^{-38}$ ; TssA-TssA OR= 1.42,  $P=6.15 \times 10^{-36}$ ). We also observed strong  
120 enrichment for interactions between CTCF binding sites (CTCF-CTCF OR=1.16;  
121  $P=1.1 \times 10^{-17}$ ) (**Figure 1E**). These results demonstrate that islet chromatin loops are  
122 prominently enriched for active regulatory sites in addition to CTCF binding sites.

123

124 We next used chromatin loops to annotate distal relationships between islet enhancers  
125 and potential target genes genome-wide (**see Methods**). Over 40% (18,240) of islet  
126 active enhancer elements interacted with at least one gene promoter region, and on  
127 average, these enhancers interacted with 2 gene promoter regions (**Figure S2, Table**  
128 **S5**). Conversely, the promoter regions of 8,448 genes had at least one loop to an  
129 enhancer element (**Figure 2A, Table S6**). Of these 8,448 genes, 1,157 had more than  
130 two independent chromatin loops to enhancer elements. Genes with multiple loops were  
131 strongly enriched for processes related to transcription factor activity and gene  
132 regulation, protein transport, and insulin signaling (**Table S7**). Among highly-looped  
133 genes were also numerous critical for islet function, such as *INS*, *ISL1*, *FOXA2*, *NKX6.1*,  
134 and *MAFB* (**Table S5**). For example, there were four distinct loops between active  
135 enhancers and *MAFB*, including several loops to enhancers over 1 MB distal (**Figure**  
136 **2B**). These results define candidate distal target genes of enhancer elements in islets.

137

138 We examined the relationship between active enhancer interactions and target gene  
139 expression level by using RNA-seq data from pancreatic islet samples<sup>18</sup> and 53 tissues  
140 in GTEx release v7 data<sup>19</sup>. A significantly higher proportion of genes expressed in islets  
141 had at least one enhancer loop compared to non-islet expressed genes ( $\ln(\text{TPM}) > 1$ ;  
142  $\text{expr} = .48$ ,  $\text{non-expr} = .30$ , Chi-square  $P = 2.2 \times 10^{-16}$ ). Genes with increasing numbers of  
143 enhancer loops had, on average, higher expression level in islets ( $\rho = .15$ ,  $P = 2.2 \times 10^{-16}$ ),  
144 with the highest expression among genes with 6 or more loops (median = 19.8 TPM)  
145 (**Figure 2C**). The number of islet enhancer interactions was also a significant predictor  
146 of expression level in islets ( $\beta = .10$ ,  $P = 6.4 \times 10^{-4}$ ), and not of relative expression level in  
147 any of the other 53 tissues in GTEx (all  $P > .05$ ) (**Figure 2D**). We measured the relative  
148 expression level of genes in islets and 53 GTEx tissues normalized across all tissues  
149 (**see Methods**), and again observed a significant relationship between enhancer loops  
150 and relative expression level in islets and no other tissues (**Figure S2**). These results  
151 suggest distal islet enhancer chromatin loops are correlated with islet-specific gene  
152 expression patterns.

153

154 We next determined the effects of genetic variants in islet enhancers on target gene  
155 regulation. We generated expression quantitative trait loci (eQTL) data in 230 islet RNA-  
156 seq samples by combining summary statistics from two published studies through meta-  
157 analysis<sup>7,18</sup> (**see Methods**). We identified variants overlapping classes of islet regulatory  
158 elements genome-wide. We then quantified the eQTL association of these variants to  
159 target genes determined from their proximity to nearby genes and from chromatin loops  
160 (**see Methods**). As expected, we observed the strongest eQTL evidence for active  
161 promoter and enhancer variants proximal to genes (TssA median  $-\log_{10}(P) = .65$ , EnhA  
162 proximal median  $-\log_{10}(P) = .50$ ) (**Figure 2E**). For variants in distal enhancers, we  
163 observed stronger evidence for islet eQTL association among genes in loops relative to  
164 non-loop genes (EnhA interacting median = .35, EnhA non-interacting median = .31,  
165 Wilcox  $P = 2.2 \times 10^{-16}$ ), even when matching based on gene distance to the enhancer  
166 (Wilcox  $P = 2.9 \times 10^{-4}$ ) (**Figure 2E**). These results suggest that genetic variants in distal  
167 islet enhancer elements are preferentially correlated with the expression level of genes  
168 within chromatin loops.

169

170 Genetic variants at T2D risk loci are enriched for islet regulatory elements<sup>1,2,4,5</sup>, but the  
171 effects of variants in regulatory elements on T2D risk in the context of chromatin looping  
172 is unknown. We determined the effects of variants in islet regulatory elements and  
173 chromatin loops on T2D risk using association data of 6.1M common (MAF>.05) variants  
174 with fgwas and LD-score regression<sup>20,21</sup>. We observed strongest enrichment of variants  
175 in active regulatory elements, most notably in active enhancers (EnhA1 fgwas  
176  $\ln(\text{enrich})=3.9$ , LD-score  $Z=3.1$ ) (**Figure 3A, Figure S3**). The effects of variants in active  
177 enhancer and promoter elements on T2D risk were more pronounced among those in  
178 chromatin loops (EnhA1 fgwas  $\ln(\text{enrich})=4.38$ , LD-score  $Z=3.1$ ; TssA fgwas  
179  $\ln(\text{enrich})=3.03$ , LD-score  $Z=0.86$ ) (**Figure 3B, Figure S3**). Conversely, variants in other  
180 islet elements such as flanking promoters and weak enhancers and were more enriched  
181 outside of loops (**Figure 3B, Figure S3**). To determine the inter-dependence of these  
182 effects, we jointly modelled variants in islet regulatory elements on T2D risk, while also  
183 including variants in GENCODE coding exons and UTRs. In a joint model, we observed  
184 enrichment of variants in islet active enhancer elements (EnhA1  $\ln(\text{enrich})=4.04$ ), in  
185 addition to flanking promoters (TssFlnk  $\ln(\text{enrich})=3.77$ ) and coding exons (CDS  
186  $\ln(\text{enrich})=2.34$ ) (**Figure S3**). These results demonstrate genome-wide enrichment of  
187 variants in islet active regulatory elements within chromatin loops for T2D risk.

188

189 To identify T2D risk signals mapping in islet enhancers, we used effects from the joint  
190 enrichment model as priors on the causal evidence (PPA) for both variants at known  
191 T2D loci and in windows genome-wide<sup>1,2,21</sup> (**see Methods**). Among 107 known risk  
192 signals, variants in islet enhancers accounted for almost a third (29%) of the total  
193 probability mass (**Table S8, Figure 3C**). We clustered known risk signals based on  
194 annotations at candidate causal variants (**see Methods**) and identified 30 signals where  
195 the causal variant was likely in an islet enhancer (**Figure 3D**). The 30 T2D islet enhancer  
196 signals were associated with IGTT-based insulin secretion phenotypes significantly more  
197 than un-annotated signals (Enh=42%, un-annot=17%, Chi-square  $P=1 \times 10^{-7}$ ), supporting  
198 a role in islet function<sup>22</sup> (**Figure 3E**). Fine-mapping including functional priors improved  
199 resolution of causal variants at the 30 T2D islet enhancer signals (avg. 3.5 enh variants)  
200 (**Figure 3F**), and at 6 signals resolved a single causal islet enhancer variant (**Table S8**).  
201 One example is previously unreported variant rs7732130 (*ZBED3*; PPA=98%) in a  
202 chromatin loop and which has allelic effects on islet enhancer activity (T-test Fwd  
203  $P=3.7 \times 10^{-3}$ , Rev  $P=6.8 \times 10^{-6}$ ) (**Figure 3G, 3H**). Outside of known loci, we identified an

204 additional 131 1MB windows genome-wide harboring putative T2D enhancer variants  
205 (**Figure S3, Table S9; see Methods**). These results identify a large number of known  
206 and putative T2D risk signals with causal variants in islet enhancers.

207

208 A large percentage of T2D risk signals map in islet enhancers, and the gene targets of  
209 these signals are largely unknown. We defined candidate target genes based on gene  
210 promoter regions in chromatin loops with, or in proximity to, T2D enhancer signals  
211 (**Figure 3D, see Methods**). T2D enhancer signals had on average 2 target genes  
212 (**Figure 4A, 4B, Table S10**), a large reduction in candidate gene numbers obtained  
213 when using a 1MB window (avg.=18 genes) or TAD definitions (avg.=7 genes) (**Figure**  
214 **4A**). Target genes were enriched in gene sets related to protein transport and secretion,  
215 potassium ion transport, vesicles and vesicle membranes, and endoplasmic reticulum  
216 (FDR<.2) (**Figure 4B, Table S11**). Target genes also included multiple involved in  
217 MODY and other monogenic and syndromic diabetes (*ABCC8, KCNJ11, GCK, INS,*  
218 *GLIS3, WFS1*) (**Figure S4**). Conversely, non-target genes within 1MB of these same 30  
219 signals were enriched for gene sets related to stress-response and other processes  
220 (FDR<.2), suggesting regulatory programs potentially activated in other cellular states  
221 (**Table S11, see Methods**). At several loci, loops implicated target genes highly distal  
222 (>500kb) to T2D enhancer variants; for example, multiple *KCNQ1* signals interacted with  
223 *INS/IGF2* over 700kb distal, and *ZMIZ1* interacted with *POLR3A* over 1MB distal (**Figure**  
224 **S4**). These results define putative target genes of T2D enhancer signals involved in  
225 protein transport and secretion and monogenic diabetes.

226

227 We then further identified target genes regulated by T2D enhancer signals using islet  
228 eQTL data. At each signal, we tested the most likely casual enhancer variant for eQTL  
229 association to each target gene correcting for the total number of target genes (**see**  
230 **Methods**). For genes with eQTL evidence (P<.05), we further confirmed eQTL and T2D  
231 signals were unlikely to be driven by distinct causal variants using Bayesian co-  
232 localization (**see Methods**). Target genes showed evidence of islet eQTLs with 8 known  
233 T2D islet enhancer signals (P<.05) including *CAMK1D, ABCB9, C2CD4B,* and *IGF2BP2*  
234 (**Figure 4D, Table S12**). For example, known T2D variant rs11257655 is in an islet  
235 active enhancer element that loops to the *CAMK1D* promoter and is an islet eQTL for  
236 *CAMK1D* expression<sup>23</sup> (**Figure 4E**). At the 131 putative T2D enhancer signals, we  
237 identified 12 additional target genes with evidence for eQTLs to T2D variants (P<.05)

238 such as *FADS1*, *VEGFA*, *SNX32* and *SCRN2* (**Table S12**). Among the 21 directly  
239 regulated genes, nearly a third have not been identified as significant islet eQTLs in  
240 previous studies<sup>7,18,41</sup>. Target genes with islet eQTLs to known and putative T2D  
241 enhancer signals were specifically enriched for genes involved in vesicle-mediated  
242 transport (FDR<.2) (**Figure 4C**, **Table S11**). These results demonstrate that target  
243 genes of T2D islet enhancer signals are involved in protein transport and secretion.

244

245 Among novel target genes, *IGF2BP2* has a strong islet eQTL with T2D enhancer  
246 variants and has no known role in T2D-relevant islet biology. As T2D risk alleles are  
247 correlated with reduced *IGF2BP2* expression and reduced insulin secretion  
248 phenotypes<sup>22</sup>, we hypothesized that reduced *IGF2BP2* expression in islets would  
249 increase T2D risk. We thus determined the effects of reduced *IGF2BP2* on islet function  
250 using a mouse model. *IGF2BP2/Imp2* is widely expressed in adult mouse tissues  
251 including fat, muscle, liver and pancreas<sup>24</sup>, and in the pancreas *Imp2* expression  
252 localized to islets and overlapped insulin (**Figure 5A**). We inactivated *Imp2* in mouse  
253 beta cells by recombining the *Imp2<sup>flox(f)</sup>* allele with Cre recombinase driven by the rat  
254 insulin 2 promoter (*RIP2-Cre*) (**Figure S5A**). Immunoblot analysis of extracts from  
255 isolated *Imp2<sup>ff</sup>/RIP2-Cre* islets confirmed reduced *Imp2* abundance compared to *Imp2<sup>ff</sup>*  
256 islets (**Figure 5B**). *Imp2<sup>ff</sup>/RIP2-Cre* mice exhibited no overt phenotype and gained  
257 weight similar to *Imp2<sup>ff</sup>* controls on both a normal chow (NCD) and high fat diet (HFD)  
258 (**Figure S5B**).

259

260 We next assessed the effect of *IGF2BP2* deficiency in mouse beta cells on glucose  
261 homeostasis. At 10 weeks of age, *Imp2<sup>ff</sup>* and *Imp2<sup>ff</sup>/RIP2-Cre* mice on NCD exhibited no  
262 difference in blood glucose and insulin levels. By contrast, blood insulin and C-peptide  
263 levels were reduced in HFD-fed *Imp2<sup>ff</sup>/RIP2-Cre* compared to HFD-fed control mice,  
264 whereas blood glucose and glucagon levels were similar (**Figure 5C**). When challenged  
265 with an intraperitoneal glucose injection, HFD-fed, but not NCD-fed, *Imp2<sup>ff</sup>/RIP2-Cre*  
266 mice exhibited significantly higher glucose and lower insulin levels than *Imp2<sup>ff</sup>* mice  
267 (**Figure 5D,E**). Importantly, this was not due to a difference in insulin sensitivity, as blood  
268 glucose levels after an intraperitoneal insulin injection were similar in *Imp2<sup>ff</sup>* and  
269 *Imp2<sup>ff</sup>/RIP2-Cre* mice (**Figure S5C**). These results indicate that *IGF2BP2* deficiency  
270 limits the capacity of beta cells to augment insulin secretion in response to increased  
271 insulin demand.



272

273 In summary, we defined the genomic location, function, and spatial orientation of  
274 regulatory elements in pancreatic islets. Islet active regulatory elements preferentially  
275 interacted with other active elements, in many cases at distances over 1MB, and we  
276 identified putative target genes for thousands of islet distal enhancers. Target genes of  
277 T2D islet enhancer signals were specifically involved in processes related to protein  
278 transport and secretion, and we validated that reduced activity of a previously unknown  
279 target gene *IGF2BP2* in mouse islets leads to defects in glucose-stimulated insulin  
280 secretion. Together our results define distal regulatory networks in islets and link T2D  
281 risk to enhancer regulation of protein transport and secretion. Furthermore, these  
282 results highlight the utility of high-resolution chromatin conformation maps in dissecting  
283 the gene regulatory networks underlying genetic risk of T2D and other complex disease.

284

## 285 **Methods**

286

### 287 **Islet ATAC-seq data generation**

288 Four human islet donors were obtained from the Integrated Islet Distribution Program  
289 (IIDP) (**Table S1**). Islet preparations were further enriched and selected using zinc-  
290 dithizone staining. We generated ATAC-seq data from the four human islet samples  
291 with a protocol as previously described<sup>11</sup>. For each sample, we trimmed adaptor  
292 sequences using TrimGalore (<https://github.com/FelixKrueger/TrimGalore>). The resulting  
293 sequences were aligned to sex-specific hg19 reference genomes using bwa mem<sup>25,26</sup>.  
294 We filtered reads were to retain those in proper pairs and with mapping quality score  
295 greater than 30. We then removed duplicate and non-autosomal reads. We called  
296 peaks individually for each sample with MACS2<sup>12</sup> at a q-value threshold of .05 with the  
297 following options “—no-model”, “—shift -100”, “—extsize 200”. We removed peaks that  
298 overlapped genomic regions blacklisted by the ENCODE consortium and merged the  
299 peaks<sup>26</sup>. In total, we obtained 105,734 merged peaks. To assess concordance between  
300 ATAC-seq experiments, we calculated read coverage at 200 bp bins genome-wide,  
301 excluding blacklisted genomic regions. We then calculated the Pearson correlation  
302 between the read counts for each sample.

303

### 304 **Islet Hi-C data generation**

305 We generated Hi-C data from three pancreatic islet samples, two of which also had  
306 ATAC-seq data (**Table S1**). Islet preparations were further enriched and selected using  
307 zinc-dithizone staining. *In situ* Hi-C was performed using a previously published protocol  
308 with modifications adapted to frozen human tissue<sup>17</sup>. Briefly, the tissue was cut to fine  
309 pieces and washed with cold PBS. Cross-linking was carried out with 1% formaldehyde  
310 (sigma) in PBS at room temperature (RT) for 10 min and quenched with 125mM Glycine  
311 (sigma) at RT for 5 min. Nuclei were isolated using a loose-fitting douncer in hypotonic  
312 buffer (20mM Hepes pH7.9, 10mM KCl, 1mM EDTA, 10% Glycerol and 1mM DTT with  
313 additional protease inhibitor (Roche) for 30 strokes and centrifuge at 4 °C.

314  
315 Nuclei were digested using 4 cutter restriction enzyme Mbol (NEB) at 37 °C overnight  
316 (o/n). Digested ends were filled in blunt with dBTP with biotinylated-14-ATP (Life  
317 Technologies) using Klenow DNA polymerase (NEB). Re-ligation was performed *in situ*  
318 when nucleus was intact using T4 DNA ligase (NEB) at 16 °C for 4 hrs. The cross-linking  
319 was reversed at 68 °C o/n while protein was degraded with proteinase K treatment  
320 (NEB). DNA was purified with phenol-chloroform extraction and ethanol precipitation,  
321 followed by fragmentation to 300-500 bp with the Covaris S220 ultrasonicator. Ligation  
322 products were enriched with Dynabeads My One T1 Streptavidin beads (Life  
323 Technologies). PCR was used to amplify the enriched DNA for sequencing. HiSeq 4000  
324 sequencer (Illumina) was used to sequence the library with 2x100 bp paired-end reads.

325  
326 For each sample, reads from paired end reads were aligned with bwa mem<sup>27</sup> as single-  
327 end reads, and then filtered through following steps. First, only five prime ends were kept  
328 for chimeric reads. Second, reads with low mapping quality (<10) were removed. Third,  
329 read ends were then manually paired, and PCR duplicates were removed using Picard  
330 tools (<https://github.com/broadinstitute/picard>). Finally, filtered contacts were used to  
331 create chromatin contact maps with Juicebox<sup>28</sup>.

332  
333 Contact maps for each sample were binned to 100kb, and the correlation between  
334 samples across all bins for all chromosomes was calculated using `scipy.stats.pearsonr`  
335 in `scipy`. Chromatin loops were identified by using HICCUPS<sup>8</sup> at 5kb, 10kb, and 25kb  
336 resolutions with default parameters on the Hi-C maps for each individual. The Hi-C data  
337 was then pooled across all three samples to create a single contact map, and loops  
338 were called with HICCUPS at the same resolutions with the same parameters. A single

339 loop set was then created by identifying loops where both anchors were within 20kb of  
340 one another via pgltools<sup>29</sup> and retaining the loop with the highest resolution. If multiple  
341 loops were found at the highest resolution, loops were kept from the contact map with  
342 the highest overall sequencing depth. We also called topologically associated domains  
343 (TADs) from the pooled Hi-C data using a previously described approach<sup>10</sup>.

344

#### 345 **Islet ChIP-seq data processing**

346 We obtained previously published data from ChIP-seq assays of H3K4me1, H3K27ac,  
347 H3K4me3, H3K36me3 and CTCF generated in primary islets and for which there was  
348 matching input sequence from the same sample<sup>4-6</sup>. For each assay and input, we  
349 aligned reads to the human genome hg19 using bwa<sup>30</sup> with a flag to trim reads at a  
350 quality threshold of less than 15. We converted the alignments to bam format and  
351 sorted the bam files. We then removed duplicate reads, and further filtered reads that  
352 had a mapping quality score below 30. Multiple sequence datasets obtained from the  
353 same assay in the same sample were then pooled.

354

355 We defined chromatin states from ChIP-seq data using ChromHMM<sup>14</sup> with a 9-state  
356 model, as calling larger state numbers did not empirically appear to identify additional  
357 states. We assigned the resulting states names based on patterns previously described  
358 in the NIH Roadmap and ENCODE projects – CTCF (CTCF), Transcribed (Txn;  
359 H3K36me3), Active promoter (TssA; H3K4me3, H3K4me1), Flanking promoter (TssFlnk;  
360 H3K4me3, H3K4me1, H3K27ac), Weak/Poised Enhancer (EnhWk; H3K4me1), Active  
361 Enhancer 1 (EnhA-1; H3K27ac), Active Enhancer 2 (EnhA-2; H3K27ac, H3K4me1), and  
362 two Quiescent states (Quies; low signal for all assays).

363

364 We then annotated accessible chromatin sites based on overlap with the chromatin  
365 states. If an accessible chromatin site overlapped multiple chromatin states, we split the  
366 site into multiple distinct elements.

367

#### 368 **Islet chromatin interaction analyses**

369 To determine the normalized tag counts of ATAC-seq data at loop anchors, loop anchors  
370 were converted to a regular BED file with pgltools<sup>29</sup>, and HOMER<sup>31</sup> was used to find the  
371 normalized tag density across all loop anchors for each ATAC-seq sample. Output from  
372 HOMER was normalized to a maximum height of 1 for each sample to determine the

373 distribution of ATAC-seq signal within each sample, rather than the relative magnitude  
374 coverage difference between ATAC-seq samples.

375

376 To determine the enrichment of each class of islet regulatory elements near loops, and  
377 the types of elements colocalized by loops, we utilized pgltools and HOMER to integrate  
378 the ATAC-seq and Hi-C data. We first created a size matched null distribution  
379 comprised of 7,000 permuted regions. Next, for each islet accessible chromatin state,  
380 we identified the proportion of states within 25kb of a loop. We determined the fold  
381 enrichment of each class over the average calculated from the null distribution, and  
382 determined significance as the number of permuted counts greater than the observed.

383

384 To determine which pairs of islet regulatory elements were in chromatin loops at a  
385 statistically significant level, we compared the distribution of islet regulatory elements  
386 around loop anchors using HOMER. We utilized the “annotateInteractions” function to  
387 obtain logistic regression p-values and odds ratio enrichment estimates for all pairs of  
388 islet regulatory elements.

389

390 We defined candidate target genes of islet enhancer elements using Hi-C loops in the  
391 following way. First, we identified all islet active enhancer elements mapping within 25kb  
392 of a Hi-C loop anchor. We then filtered these loops based on whether the other anchor  
393 mapped within 25kb of a promoter region (-5kb/+2kb of transcription start site) for  
394 protein-coding or long non-coding genes in GENCODEv27<sup>32</sup>. For each active enhancer,  
395 we then calculated the number of gene promoter regions interacting with that enhancer.  
396 For each gene promoter region, we calculated the number of independent interactions  
397 containing at least one active enhancer element.

398

399 We identified genes with multiple (>2) active enhancer interactions and tested these  
400 genes for gene set enrichment using GSEA<sup>33</sup>, considering only gene sets with more than  
401 25 genes at an FDR>.2.

402

### 403 **Genomic enrichment analyses**

404 We tested for enrichment of variants in each accessible chromatin class using T2D  
405 association data of 1000 Genomes project variants from the DIAGRAM consortium<sup>21</sup>.  
406 From this meta-analysis, we identified common variants (with minor allele frequency

407 (MAF)>.05). In total, we retained 6.1M common variants for testing. For each variant,  
408 we then calculated a Bayes Factor from effect size estimates and standard errors using  
409 the approach of Wakefield<sup>34</sup>.

410

411 We then modelled the effect of variants in each class of islet regulatory elements on T2D  
412 risk using fgwas<sup>20</sup>. For these analyses, we used a window size (-k) that resulted in a  
413 1Mb window on average. We first tested for enrichment of variants in each state  
414 individually. We then built a joint model iteratively in the following way. We first identified  
415 the annotation with the highest likelihood. We then added annotations to the model until  
416 the likelihood did not increase further. Using this model, we introduced a series of  
417 penalties from 0 to .5 in increments of .01 and fit the model using each penalty, and  
418 identified the penalty that gave the highest cross-validation likelihood. We then finally  
419 removed annotations from the model that further increased the cross-validation  
420 likelihood. We considered the resulting set of annotations and effects to be the optimal  
421 joint model.

422

423 We also modelled the effect of variants in islet regulatory elements using LD-score  
424 regression. For these analyses, we extracted variants in HapMap3 from T2D  
425 association data. We then calculated LD scores for variants in each regulatory element  
426 class. Finally, we obtained enrichment estimates using these LD scores with T2D  
427 association data of HapMap3 variants.

428

#### 429 **Fine-mapping of T2D risk variants**

430 We used the effects from the joint enrichment model as priors on the evidence for  
431 variants at 107 known T2D signals using fine-mapping data from the MetaboChip<sup>2</sup>,  
432 GoT2D<sup>1</sup> and DIAGRAM 1000 Genomes<sup>21</sup> studies. We used data of 49 T2D signals at  
433 39 T2D loci on the MetaboChip, 41 additional T2D signals from GoT2D data for T2D loci  
434 not on the MetaboChip, and 17 additional T2D signals in DIAGRAM 1000G not in  
435 MetaboChip or GoT2D.

436

437 For each signal, we obtained the enrichment effect of the islet regulatory or coding  
438 annotation overlapping that variant. We calculated a prior probability for the variant by  
439 dividing the effect by the sum of effects across all variants at a signal. We then  
440 multiplied this prior probability by the Bayes Factor for each variant. From the resulting

441 odds, we calculated a posterior probability that the variant is causal for T2D risk (PPA)  
442 by dividing the odds by the sum of odds across all variants at the locus.

443

444 For each signal, we calculated a cumulative PPA (cPPA) value for islet enhancer  
445 (EnhA1, EnhA2, EnhWk), promoter (TssA, TssFlnk), CTCF binding site, UTR, and  
446 coding exon (CDS) annotations by summing the PPAs of all variants overlapping each  
447 annotation. We then clustered T2D signals into groups based on cPPA values using k-  
448 means clustering.

449

450 We determined the effects of T2D signals in each cluster on glycemic association data<sup>22</sup>.  
451 We identified 73 T2D signals represented in these data and cataloged 23 associated at  
452  $P < .05$  with first-phase insulin response, peak insulin response, AIR, or insulin secretion  
453 rate. We calculated the percentage of signals in each cluster associated with these  
454 measures and tested for differences between clusters using a chi-square test.

455

456 For the 30 T2D islet enhancer signals, we calculated “99% credible sets” as the set of  
457 candidate variants that explain 99% of the total PPA using genetic fine-mapping data  
458 alone (genetic), and fine-mapping including priors from the joint genome-wide  
459 enrichment model (+priors).

460

461 We then fine-mapped casual variants in putative T2D loci genome-wide. For variants in  
462 each 1MB window across the genome, after excluding any windows overlapping a  
463 known T2D signal, we obtained the effect of the islet annotation overlapping that variant.  
464 We calculated a prior probability for each variant as described above also including an  
465 additional prior on the evidence that the 1MB window is a T2D locus. We multiplied both  
466 prior probabilities by the Bayes Factor for each variant. From the resulting odds, we  
467 calculated the PPA that each variant is causal for T2D risk. We then considered the 131  
468 windows with at least one islet enhancer variant with  $PPA > .01$  in downstream analyses.

469

#### 470 **Genomic features analyses**

471 For each class of islet open chromatin, we determined the overlap with other genomic  
472 features.

473

474 We identified motifs enriched in sequence underneath each islet accessible chromatin  
475 class. We first extracted genomic sequence for each site using bedtools<sup>35</sup>, and masked  
476 repetitive sequences. We then identified *de novo* motifs enriched in this sequence using  
477 DREME<sup>36</sup>. For each *de novo* motif, we determined whether this motif matched a known  
478 sequence motif in a custom database of >2,500 motifs from ENCODE, JASPAR and  
479 SELEX with tomtom<sup>26,37-39</sup>.

480

481 We determined the overlap of islet accessible chromatin classes with transcription factor  
482 (TF) ChIP-seq data in islets for 5 proteins<sup>4,26</sup>. For each islet chromatin class, we  
483 calculated the Jaccard index of overlap with sites for each TF<sup>35</sup>. We then determined  
484 the overlap of islet accessible chromatin classes with DHS sites from 384 cell types in  
485 the ENCODE project<sup>26</sup>. We first filtered out DHS sites from islets, and then for each  
486 accessible chromatin site, we calculated the percentage of ENCODE cell-types the site  
487 was active in. We then determined the median percent overlap across all sites within  
488 each accessible chromatin class.

489

#### 490 **Gene expression analysis**

491 We obtained transcript-per-million (TPM) counts from RNA-seq data in 53 tissues from  
492 the GTEx project release v7<sup>19</sup>. We further obtained RPKM read counts from RNA-seq  
493 data of 118 pancreatic islet samples<sup>18</sup>, and calculated TPM values as previously  
494 described<sup>40</sup>. We then retained only protein-coding and long non-coding genes  
495 annotated in GENCODEv27<sup>32</sup>. We first calculated the percentage of genes expressed in  
496 islets (defined as  $\ln(\text{TPM}) > 1$ ) and not expressed in islets with at least one enhancer  
497 chromatin loop to the promoter region and tested for a significant difference using a Chi-  
498 square test.

499

500 Across all 54 tissues, we filtered out genes not expressed ( $\ln(\text{TPM}) > 1$ ) in at least one  
501 tissue. We determined correlation between gene expression level in islets and enhancer  
502 loop number using Spearman's rho. We further grouped genes by the number of  
503 chromatin loops to enhancer elements and calculated the median islet TPM value for  
504 each group. For genes with at least one enhancer loop, we created a linear model of  
505 log-transformed gene TPM with chromatin loop number as the predictor using the glm  
506 package in R. Values are reported as the p-value, effect size (beta) and standard error  
507 from the resulting model.

508

509 We then determined the relative expression level for each gene in 54 tissues. We log-  
510 transformed expression values and calculated a z-score for each gene using the mean  
511 and standard deviation across tissues. We then repeated the above analyses using  
512 tissue z-scores instead of tissue TPM values.

513

#### 514 **Islet expression QTL analysis**

515 We obtained summary statistic eQTL data from two published studies of 118 and 112  
516 primary pancreatic islet samples<sup>18,41</sup>. We then performed inverse sample-size weighted  
517 meta-analysis to combine the summary results for each variant and gene pair using  
518 METAL<sup>42</sup>. We retained only protein-coding and long non-coding RNA genes as defined  
519 by GENCODEv27<sup>32</sup>, only variant and gene pairs tested in both studies, and only variants  
520 with minor allele frequency (MAF) > .01.

521

522 We extracted eQTL associations for variants in classes of islet accessible chromatin. To  
523 remove potential biases due to linkage disequilibrium, we sorted variant associations  
524 based on p-value and iteratively pruned out variants in LD ( $r^2 > .5$ ) with a more significant  
525 variant using LD information in European samples from 1000 Genomes project data.  
526 We then extracted pruned eQTL associations for variants in active promoter elements  
527 for genes within 20 kb (TssA), variants in active enhancer elements for genes within 20  
528 kb (EnhA proximal), variants in active enhancer elements for genes in chromatin loops  
529 (EnhA distal target), and variants in active enhancer elements for genes without a loop  
530 (EnhA distal no-target). For each set of eQTL associations, we compared p-value  
531 distributions using a two-sided Wilcox rank-sum test. To remove potential biases in  
532 variant distances to loop and no-loop genes, we randomly selected variant-gene pairs  
533 matched on distance to the distal target set to re-performed analyses.

534

#### 535 **Target genes of T2D islet enhancer signals**

536 We defined candidate target genes of 30 known T2D enhancer signals and 131 putative  
537 T2D enhancer windows in the following way. We identified candidate causal variants at  
538 each signal overlapping islet enhancer elements and considered target genes as those  
539 where a candidate variant either (a) mapped in a chromatin loop to the promoter region  
540 (-5kb/+2kb of transcription start site) or (b) was within 25kb proximal to the promoter  
541 region.



542

543 We next defined alternate sets of target genes of the 30 T2D enhancer signals based on  
544 1MB windows or TAD boundaries. For 1MB window definitions, we identified the  
545 highest probability variant for each signal and extracted a +/-1MB window around the  
546 variant position. We then considered gene promoter regions (-5kb/+2kb of transcription  
547 start site) for protein-coding or long non-coding genes in GENCODEv27 that overlapped  
548 this +/-1MB window the set of target genes. For TAD boundary definitions, we  
549 intersected the merged set of TADs with gene promoter regions to obtain a set of genes  
550 within each TAD. We then intersected the highest probability variant at each T2D signal  
551 with TADs to obtain gene sets in the TAD.

552

553 For each enhancer signal with a candidate target gene, we extracted eQTL p-values for  
554 each target gene using the islet enhancer variant with the highest PPA at the signal.  
555 Where the highest probability variant was not present in the eQTL dataset, we used the  
556 next most probable islet enhancer variant. We then Bonferroni-corrected eQTL p-values  
557 for the total number of candidate target genes at the signal and considered eQTLs  
558 significant with a corrected p-value<.05.

559

560 For genes with significant eQTL evidence we further tested whether T2D and eQTL  
561 signals were co-localized. We obtained the T2D Bayes Factor for each variant at the  
562 signal from fine-mapping data. For significant gene eQTLs at the signal, we then  
563 calculated the Bayes Factor that each variant is an islet eQTL for that gene<sup>34</sup>. We  
564 compared Bayes Factors for T2D signals and eQTLs for each gene using Bayesian co-  
565 localization<sup>43</sup>. We considered the prior probability that a variant was causal for T2D risk  
566 or an islet eQTL as  $1 \times 10^{-4}$ , and the prior probability that a variant was causal for both  
567 T2D risk and an islet eQTL as  $1 \times 10^{-5}$ . We considered signals as having evidence for co-  
568 localization where the probability of a shared causal variant was higher than the  
569 probability of two distinct causal variants.

570

571 We tested target genes for gene set enrichment using GSEA<sup>33</sup>, considering only gene  
572 sets with more than 25 total genes and at an FDR threshold of .2.

573

574 **Luciferase reporter assays**

575 To test for allelic differences in enhancer activity at rs7732130, we cloned sequences  
576 containing alt or ref alleles in forward and reverse orientation upstream of the minimal  
577 promoter of firefly luciferase vector pGL4.23 (Promega) using KpnI and SacI restriction  
578 sites.

579

580 The primer sequences were:

581 forward/left: GATAACGGTACCGCGAAGTGGTCATGGGTAAA

582 forward/right: AAGTAGGAGCTCACCATCCCAGCATTTAGTGG

583 reverse/left: GATAACGAGCTCGCGAAGTGGTCATGGGTAAA

584 reverse/right: AAGTAGGGTACCACCATCCCAGCATTTAGTGG

585

586 MIN6 beta cells were seeded into 6 (or 12)-well trays at 1 million cells per well. At 80%  
587 confluency, cells were co-transfected with 400ng of the experimental firefly luciferase  
588 vector pGL4.23 containing the alt or ref allele in either orientation or an empty vector and  
589 50ng of the vector pRL-SV40 (Promega) using the Lipofectamine 3000 reagent. All  
590 transfections were done in triplicate. Cells were lysed 48 hours after transfection and  
591 assayed for Firefly and Renilla luciferase activities using the Dual-Luciferase Reporter  
592 system (Promega). Firefly activity was normalized to Renilla activity and compared to the  
593 empty vector and normalized results were expressed as fold change compared to empty  
594 vector control per allele. Error bars are reported as standard deviation. A two-sided t-  
595 test was used to compare luciferase activity between the two alleles in each orientation.

596

### 597 **Mouse *Imp2* targeting construct and physiological studies**

598 We generated the *Imp2* construct by using a genomic fragment of 12 kb containing *Imp2*  
599 exons 1 and 2 as well as flanking intron sequences of the murine gene extracted from  
600 the RP23-163F16 BAC clone. The replacement-type targeting construct consisted of 9.4  
601 kb of *Imp2* genomic sequences (4.4 kb in the left homology arm and 5.4 kb in the right  
602 homology arm) (**Figure S5**).

603

604 We bred mice for experiments by crossing *IMP2-loxp* mice (*Imp2<sup>ff</sup>*) with *RIP2-Cre* mice  
605 on a C57Bl/6J background. We maintained colonies in a specific pathogen-free facility  
606 with a 12:12 light - dark cycle and fed irradiated chow (Prolab 5P75 Isopro 3000; 5%  
607 crude fat; PMI nutrition international) or a HFD (D12492i; 60% kcal fat; Research Diets  
608 Inc.). Blood glucose, insulin, C-peptide and glucagon levels were measured by the

609 Vanderbilt metabolic core. Measurements for *Imp2<sup>ff</sup>* and *Imp2<sup>ff</sup>/RIP2-Cre* mice were  
610 performed using male mice under basal conditions (N=10), upon intraperitoneal glucose  
611 injection (N=9), and upon intraperitoneal insulin injection (N=9). A two-sided t-test was  
612 used to compare differences in measurements across genotypes.

613

#### 614 **Acknowledgements**

615 Support for this work was provided by U01DK105541 to M.S., K.F. and B.R., the Ludwig  
616 Institute for Cancer Research to B.R., R37DK017776 and P30DK057521 to J.A.,  
617 postdoc fellowship 537-2014-6796 from the Swedish Vetenskapsrådet to J.Y., and  
618 JDRF-3-2012-177 postdoc fellowship to A.W.

619

#### 620 **Author Contributions**

621 K.J.G., B.R., M.S., K.F. conceived of and supervised the research in the study; K.J.G.  
622 wrote the manuscript and performed analyses; W.W.G, J.C., Y.Q. performed analyses  
623 and contributed to writing; J.Y. performed Hi-C assays and contributed to writing; N.D.,  
624 J.A. performed mouse experiments and contributed to writing; A.W., A.A. contributed  
625 analyses and data interpretation; J.Y.H., N.V., F.D., D.G. performed ATAC-seq assays  
626 and contributed to data interpretation; N.K. and M.O. performed variant reporter  
627 experiments; L.B. and L.M. contributed to mouse experiments.

628

#### 629 **Data availability**

630 Data files for this study are available at [http://gaultonlab.org/pages/Greenwald\\_islet\\_HiC](http://gaultonlab.org/pages/Greenwald_islet_HiC)  
631 and will also be deposited in <https://www.t2depigenome.org>

632

633 **Figure legends**

634

635 **Main Figures:**

636

637 **Figure 1. Chromatin accessibility and conformation in pancreatic islets.** (A) Islet  
638 accessible chromatin signal mapped predominantly within active islet chromatin states.  
639 (B) Chromatin looping from *in situ* Hi-C assays of three pancreatic islet samples at entire  
640 chromosome (left), 25MB (middle) and 2MB (right) resolution on chromosome 7. Black  
641 circles on the right panel represent statistically significant loop calls. (C) Accessible  
642 chromatin signal from four islet samples (ISL1-4) was distributed around chromatin loop  
643 anchor midpoints (D) Islet chromatin loop anchors were enriched for islet CTCF binding  
644 sites, active enhancers, and active promoters compared to random sites. Values  
645 represent fold change and SD. (E) Islet chromatin loops were most enriched for  
646 interactions between islet active enhancers and active promoter elements, and between  
647 CTCF binding sites.

648

649 **Figure 2. Islet enhancer regulation of distal target gene expression.** (A) The  
650 promoter regions of 8.4k genes had at least one chromatin loop to an islet enhancer  
651 element. (B) Multiple islet enhancers formed chromatin loops with the *MAFB* promoter  
652 region including several over 1MB. (C) Genes with increasing numbers of chromatin  
653 loops to islet enhancers had increased expression level in islets, with the highest  
654 expression among genes with 6 or more interactions (D) The number of chromatin loops  
655 to islet enhancers was a significant predictor of islet gene expression but not 53 other  
656 tissues in GTEx. Values represent effect size and SE. \*\*P<.001 (E) Genetic variants in  
657 distal islet enhancer elements had stronger evidence for islet expression QTLs with  
658 genes in chromatin loops (blue) than genes with no loop (grey), even when matched  
659 based on distance (light blue). \*\*P<.001, \*\*\*P<.0001

660

661 **Figure 3. Type 2 diabetes risk signals map in islet enhancers.** (A) Genetic variants  
662 in islet active regulatory elements genome-wide were enriched for T2D risk, with  
663 strongest enrichment in active enhancer elements. Values represent log enrichment and  
664 95% CI. (B) The effects of variants in active enhancer and promoter elements on T2D  
665 risk were stronger among those in chromatin loops, whereas other elements were  
666 enriched for T2D outside of loops. Values represent log enrichment and 95% CI. (C)

667 Over 30% of the total causal probability across 107 known T2D risk signals mapped in  
668 islet enhancer elements. (D) Clustering of known T2D signals based on islet and coding  
669 annotations identified 30 signals with likely causal variants in islet enhancers. (E) A  
670 significantly higher percentage of T2D islet enhancer signals were associated with IGTT-  
671 based insulin secretion phenotypes than un-annotated T2D signals. \*\* $P < .001$  (F)  
672 Number of variants in the 99% credible sets for the 30 T2D islet enhancer signals based  
673 on genetic fine-mapping alone (genetic), genetic fine-mapping including functional priors  
674 (+priors) (G) T2D causal variant rs7732130 at the *ZBED3* locus mapped in an islet active  
675 enhancer and chromatin loop, and had (H) allelic effects on enhancer activity in the islet  
676 cell line MIN6 (N=3). Values represent fold change and SD. \*\* $P < .001$ , \*\*\* $P < .0001$

677

678 **Figure 4. Target genes of type 2 diabetes islet enhancer signals are involved in**  
679 **protein secretion and transport.** (A) Prioritizing target genes using chromatin loops  
680 and proximity greatly reduces the number of candidate genes over using a 1MB window  
681 (avg=18) or topologically associated domain (TAD) boundaries (avg=7). (B) T2D islet  
682 enhancer signals formed chromatin loops with, or were in proximity to, an average of 2  
683 target genes. (C) Target genes of T2D enhancer signals were strongly enriched for  
684 biological processes related to protein secretion, protein transport, vesicles and vesicle  
685 membranes, and endoplasmic reticulum (FDR<.2) (top), and target genes with islet  
686 eQTL evidence were specifically enriched for vesicle-mediated transport (FDR<.2)  
687 (bottom). (D) Target genes with islet eQTLs to T2D islet enhancer signals (corrected  
688 eQTL  $P < .05$ ; p-values reported in table are uncorrected) and evidence that T2D and  
689 eQTL signals are co-localized. (E) At the *CDC123/CAMK1D* locus T2D islet enhancer  
690 variant rs11257655 was in a chromatin loop to the *CAMK1D* promoter and an islet eQTL  
691 for *CAMK1D* expression. Probabilities (PPA) that variants are causal for T2D risk (top)  
692 and variant association ( $-\log_{10} P$ ) with islet expression level of *CAMK1D* (middle).

693

694 **Figure 5. Reduced *IGF2BP2* activity in mouse islets impairs glucose-stimulated**  
695 **insulin secretion during insulin resistance.** (A) Immunostaining of insulin and IMP2  
696 in mouse pancreas. (B) Expression of IMP2 in islets and other T2D-relevant tissues liver,  
697 adipose, muscle, and brain. (C) Blood glucose, insulin, c-peptide and glucagon level  
698 in 10-week-old male mice on high fat diet (HFD) (N=9). Wild-type (black) and  
699 *Imp2ff/RIP2-Cre* (red). (D) 1 g/kg glucose was administered intraperitoneally after  
700 overnight fasting of 12-week-old *Imp2ff* (black; N=10) and *Imp2ff/RIP2-Cre* (red; N=10)

701 male mice maintained on normal chow diet (NCD). left=blood glucose; right=serum  
702 insulin. (E) 1 g/kg glucose was administered intraperitoneally after overnight fasting to  
703 12-week-old *Imp2ff* (black; N=9) and *Imp2ff/RIP2-Cre* (red; N=9) male mice maintained  
704 on NCD. left=blood glucose; right=serum insulin. Values represent mean and SD.  
705 \*P<.05, \*\*P<.01  
706

707 **Supplemental Figures:**

708

709 **Figure S1. Characteristics of pancreatic islet regulatory elements** (A) Heatmap of  
710 the Pearson correlation of ATAC seq signal across four islet samples, calculated as the  
711 raw tag count in 1kb bins across the genome. (B) Heatmap of emission matrix  
712 probabilities for the 9-state islet model from chromHMM, with individual ChIP-seq assays  
713 shown on the x-axis and labelled chromatin states on the y-axis. (C) Heatmap showing  
714 percentage of each class of islet regulatory elements mapping in 200bp bins around  
715 GENCODE transcriptional start sites. (D) Percentage of ENCODE cell-types in DHS  
716 sites overlapping each class of islet regulatory elements. (E) Jaccard overlap of each  
717 class of islet regulatory elements with islet ChIP-seq sites for five transcription factors.  
718

719 **Figure S2. Characteristics of pancreatic islet chromatin loops** (A) Heatmap showing  
720 the Pearson correlation of Hi-C contacts across islet samples in 100kb bins across the  
721 genome. (B) Histogram of the distance between loop anchors in islets. (C) Histogram  
722 of number of loops within 25kb of each islet active enhancer to gene promoter regions.  
723 (D) Boxplot showing genes with increasing numbers of chromatin loops to islet  
724 enhancers (x-axis) had on average higher relative expression level in islets (y-axis). (E)  
725 The number of chromatin loops to islet enhancers was a significant predictor of relative  
726 gene expression level in islets but not 53 other tissues in GTEx. \*\*P<.001. Values  
727 represent effect size and SE.  
728

729 **Figure S3. Effects of variants in pancreatic islet regulatory elements on T2D risk**  
730 (A) Enrichment Z-score measured using LD-score regression for each class of islet  
731 regulatory elements (y-axis), subset by states that were (dark) or were not (light) within  
732 25kb of a Hi-C loop anchor. (B) Enrichments from the fgwas genome-wide joint model  
733 including islet active enhancers (EnhA1), flanking promoters (TssFlnk), and coding  
734 exons (CDS). Values represent log enrichment and 95% CI. (C) Posterior causal

735 probabilities (PPA) of variants within islet active enhancers in 1MB windows genome-  
736 wide excluding known T2D risk loci. Blue = variants with PPA>0.01, grey = variants with  
737 PPA<0.01.

738

739 **Figure S4. T2D enhancer signal chromatin loops to candidate target genes.** Re-  
740 weighted posterior causal probabilities of variants (top), islet Hi-C loops, chromatin  
741 states and ATAC-seq signal (middle), and known genes (bottom), for (A) five  
742 independent T2D risk signals at the *KCNQ1* locus, (B) T2D signal at the *ZMIZ1* locus,  
743 and (C) T2D signal at the *KCNJ11/ABCC8* locus. For (A), posterior probabilities are  
744 shown in different colors for each of the five independent signals.

745

746 **Figure S5. Characterization of mice after conditional *IGF2BP2* ablation in beta**  
747 **cells.** (A) Schematic representation of the wild type *Imp2* allele showing exon 1-2 and  
748 flanking intron sequences, and the *Imp2<sup>flox</sup>* targeted allele. (B) Body weight for wild-type,  
749 *RIP2-Cre*, *Imp2<sup>ff</sup>* and *Imp2<sup>ff</sup>/RIP2-Cre* mice on normal chow diet (top) and high fat diet  
750 (bottom). (C) Insulin tolerance tests in 14-week-old *Imp2<sup>ff</sup>/RIP2-Cre* (red) and *Imp2<sup>ff</sup>*  
751 (black) mice on a normal chow diet (left) and high fat diet (right). Values represent mean  
752 and SD.

753

754 **Supplemental Tables:**

755

756 **STable 1:** Donor and sequencing characteristics of pancreatic islet samples

757 **STable 2:** Regulatory elements in pancreatic islets

758 **STable 3:** Sequence motifs enriched in islet regulatory elements

759 **STable 4:** Hi-C loops identified in pancreatic islet samples

760 **STable 5:** Target gene chromatin loops of islet enhancer elements

761 **STable 6:** Islet enhancer chromatin loops of gene promoter regions

762 **STable 7:** Functional annotations enriched in genes with multiple enhancer interactions

763 **STable 8:** T2D candidate causal variants in islet active enhancers

764 **STable 9:** Target genes of T2D islet enhancer signals

765 **STable 10:** Gene set annotations enriched in target genes of T2D islet enhancer signals

766 **STable 11:** Target genes with islet eQTLs for T2D islet enhancer signals

767

768

769

- 770 1 Fuchsberger, C. *et al.* The genetic architecture of type 2 diabetes. *Nature* **536**,  
771 41-47, doi:10.1038/nature18642 (2016).
- 772 2 Gaulton, K. J. *et al.* Genetic fine mapping and genomic annotation defines causal  
773 mechanisms at type 2 diabetes susceptibility loci. *Nat Genet* **47**, 1415-1425,  
774 doi:10.1038/ng.3437 (2015).
- 775 3 Gaulton, K. J. Mechanisms of Type 2 Diabetes Risk Loci. *Curr Diab Rep* **17**, 72,  
776 doi:10.1007/s11892-017-0908-x (2017).
- 777 4 Pasquali, L. *et al.* Pancreatic islet enhancer clusters enriched in type 2 diabetes  
778 risk-associated variants. *Nat Genet* **46**, 136-143, doi:10.1038/ng.2870 (2014).
- 779 5 Parker, S. C. *et al.* Chromatin stretch enhancer states drive cell-specific gene  
780 regulation and harbor human disease risk variants. *Proc Natl Acad Sci U S A*  
781 **110**, 17921-17926, doi:10.1073/pnas.1317023110 (2013).
- 782 6 Stitzel, M. L. *et al.* Global epigenomic analysis of primary human pancreatic islets  
783 provides insights into type 2 diabetes susceptibility loci. *Cell Metab* **12**, 443-455,  
784 doi:10.1016/j.cmet.2010.09.012 (2010).
- 785 7 Varshney, A. *et al.* Genetic regulatory signatures underlying islet gene  
786 expression and type 2 diabetes. *Proc Natl Acad Sci U S A* **114**, 2301-2306,  
787 doi:10.1073/pnas.1621192114 (2017).
- 788 8 Rao, S. S. *et al.* A 3D map of the human genome at kilobase resolution reveals  
789 principles of chromatin looping. *Cell* **159**, 1665-1680,  
790 doi:10.1016/j.cell.2014.11.021 (2014).
- 791 9 Won, H. *et al.* Chromosome conformation elucidates regulatory relationships in  
792 developing human brain. *Nature* **538**, 523-527, doi:10.1038/nature19847 (2016).
- 793 10 Dixon, J. R. *et al.* Topological domains in mammalian genomes identified by  
794 analysis of chromatin interactions. *Nature* **485**, 376-380,  
795 doi:10.1038/nature11082 (2012).
- 796 11 Buenrostro, J. D., Giresi, P. G., Zaba, L. C., Chang, H. Y. & Greenleaf, W. J.  
797 Transposition of native chromatin for fast and sensitive epigenomic profiling of  
798 open chromatin, DNA-binding proteins and nucleosome position. *Nat Methods*  
799 **10**, 1213-1218, doi:10.1038/nmeth.2688 (2013).
- 800 12 Zhang, Y. *et al.* Model-based analysis of ChIP-Seq (MACS). *Genome Biol* **9**,  
801 R137, doi:10.1186/gb-2008-9-9-r137 (2008).
- 802 13 Pasquali, L. *et al.* Pancreatic islet enhancer clusters enriched in type 2 diabetes  
803 risk-associated variants. *Nature genetics* **46**, 136-143, doi:10.1038/ng.2870  
804 (2014).
- 805 14 Ernst, J. & Kellis, M. ChromHMM: automating chromatin-state discovery and  
806 characterization. *Nat Methods* **9**, 215-216, doi:10.1038/nmeth.1906 (2012).
- 807 15 Gaulton, K. J. *et al.* A map of open chromatin in human pancreatic islets. *Nat*  
808 *Genet* **42**, 255-259, doi:10.1038/ng.530 (2010).
- 809 16 Yu, M. & Ren, B. The Three-Dimensional Organization of Mammalian Genomes.  
810 *Annu Rev Cell Dev Biol* **33**, 265-289, doi:10.1146/annurev-cellbio-100616-  
811 060531 (2017).
- 812 17 Yan, J. *et al.* Histone H3 lysine 4 monomethylation modulates long-range  
813 chromatin interactions at enhancers. *Cell Res*, doi:10.1038/cr.2018.1 (2018).
- 814 18 van de Bunt, M. *et al.* Transcript Expression Data from Human Islets Links  
815 Regulatory Signals from Genome-Wide Association Studies for Type 2 Diabetes  
816 and Glycemic Traits to Their Downstream Effectors. *PLoS Genet* **11**, e1005694,  
817 doi:10.1371/journal.pgen.1005694 (2015).
- 818 19 Consortium, G. T. *et al.* Genetic effects on gene expression across human  
819 tissues. *Nature* **550**, 204-213, doi:10.1038/nature24277 (2017).



- 820 20 Pickrell, J. K. Joint analysis of functional genomic data and genome-wide  
821 association studies of 18 human traits. *Am J Hum Genet* **94**, 559-573,  
822 doi:10.1016/j.ajhg.2014.03.004 (2014).
- 823 21 Scott, R. A. *et al.* An Expanded Genome-Wide Association Study of Type 2  
824 Diabetes in Europeans. *Diabetes* **66**, 2888-2902, doi:10.2337/db16-1253 (2017).
- 825 22 Wood, A. R. *et al.* A Genome-Wide Association Study of IVGTT-Based Measures  
826 of First-Phase Insulin Secretion Refines the Underlying Physiology of Type 2  
827 Diabetes Variants. *Diabetes* **66**, 2296-2309, doi:10.2337/db16-1452 (2017).
- 828 23 Fogarty, M. P., Cannon, M. E., Vadlamudi, S., Gaulton, K. J. & Mohlke, K. L.  
829 Identification of a regulatory variant that binds FOXA1 and FOXA2 at the  
830 CDC123/CAMK1D type 2 diabetes GWAS locus. *PLoS Genet* **10**, e1004633,  
831 doi:10.1371/journal.pgen.1004633 (2014).
- 832 24 Dai, N. *et al.* mTOR phosphorylates IMP2 to promote IGF2 mRNA translation by  
833 internal ribosomal entry. *Genes Dev* **25**, 1159-1172, doi:10.1101/gad.2042311  
834 (2011).
- 835 25 Li, H. & Durbin, R. Fast and accurate short read alignment with Burrows-Wheeler  
836 transform. *Bioinformatics* **25**, 1754-1760, doi:10.1093/bioinformatics/btp324  
837 (2009).
- 838 26 Consortium, E. P. An integrated encyclopedia of DNA elements in the human  
839 genome. *Nature* **489**, 57-74, doi:10.1038/nature11247 (2012).
- 840 27 Li, H. Aligning sequence reads, clone sequences and assembly contigs with  
841 BWA-MEM. *ArXiv e-prints* **1303** (2013).  
842 <<http://adsabs.harvard.edu/abs/2013arXiv1303.3997L>>.
- 843 28 Durand, N. C. *et al.* Juicebox Provides a Visualization System for Hi-C Contact  
844 Maps with Unlimited Zoom. *Cell Syst* **3**, 99-101, doi:10.1016/j.cels.2015.07.012  
845 (2016).
- 846 29 Greenwald, W. W. *et al.* Pgltools: a genomic arithmetic tool suite for manipulation  
847 of Hi-C peak and other chromatin interaction data. *BMC Bioinformatics* **18**, 207,  
848 doi:10.1186/s12859-017-1621-0 (2017).
- 849 30 Li, H. & Durbin, R. Fast and accurate long-read alignment with Burrows-Wheeler  
850 transform. *Bioinformatics* **26**, 589-595, doi:10.1093/bioinformatics/btp698 (2010).
- 851 31 Heinz, S. *et al.* Simple combinations of lineage-determining transcription factors  
852 prime cis-regulatory elements required for macrophage and B cell identities. *Mol*  
853 *Cell* **38**, 576-589, doi:10.1016/j.molcel.2010.05.004 (2010).
- 854 32 Harrow, J. *et al.* GENCODE: the reference human genome annotation for The  
855 ENCODE Project. *Genome Res* **22**, 1760-1774, doi:10.1101/gr.135350.111  
856 (2012).
- 857 33 Subramanian, A. *et al.* Gene set enrichment analysis: a knowledge-based  
858 approach for interpreting genome-wide expression profiles. *Proc Natl Acad Sci U*  
859 *S A* **102**, 15545-15550, doi:10.1073/pnas.0506580102 (2005).
- 860 34 Wakefield, J. A Bayesian measure of the probability of false discovery in genetic  
861 epidemiology studies. *Am J Hum Genet* **81**, 208-227, doi:10.1086/519024  
862 (2007).
- 863 35 Quinlan, A. R. & Hall, I. M. BEDTools: a flexible suite of utilities for comparing  
864 genomic features. *Bioinformatics* **26**, 841-842, doi:10.1093/bioinformatics/btq033  
865 (2010).
- 866 36 Bailey, T. L. DREME: motif discovery in transcription factor ChIP-seq data.  
867 *Bioinformatics* **27**, 1653-1659, doi:10.1093/bioinformatics/btr261 (2011).
- 868 37 Bailey, T. L., Johnson, J., Grant, C. E. & Noble, W. S. The MEME Suite. *Nucleic*  
869 *Acids Res* **43**, W39-49, doi:10.1093/nar/gkv416 (2015).

- 870 38 Bryne, J. C. *et al.* JASPAR, the open access database of transcription factor-  
871 binding profiles: new content and tools in the 2008 update. *Nucleic Acids Res* **36**,  
872 D102-106, doi:10.1093/nar/gkm955 (2008).
- 873 39 Jolma, A. *et al.* Multiplexed massively parallel SELEX for characterization of  
874 human transcription factor binding specificities. *Genome Res* **20**, 861-873,  
875 doi:10.1101/gr.100552.109 (2010).
- 876 40 Li, B., Ruotti, V., Stewart, R. M., Thomson, J. A. & Dewey, C. N. RNA-Seq gene  
877 expression estimation with read mapping uncertainty. *Bioinformatics* **26**, 493-  
878 500, doi:10.1093/bioinformatics/btp692 (2010).
- 879 41 Fadista, J. *et al.* Global genomic and transcriptomic analysis of human pancreatic  
880 islets reveals novel genes influencing glucose metabolism. *Proc Natl Acad Sci U*  
881 *S A* **111**, 13924-13929, doi:10.1073/pnas.1402665111 (2014).
- 882 42 Willer, C. J., Li, Y. & Abecasis, G. R. METAL: fast and efficient meta-analysis of  
883 genomewide association scans. *Bioinformatics* **26**, 2190-2191,  
884 doi:10.1093/bioinformatics/btq340 (2010).
- 885 43 Giambartolomei, C. *et al.* Bayesian test for colocalisation between pairs of  
886 genetic association studies using summary statistics. *PLoS Genet* **10**, e1004383,  
887 doi:10.1371/journal.pgen.1004383 (2014).
- 888

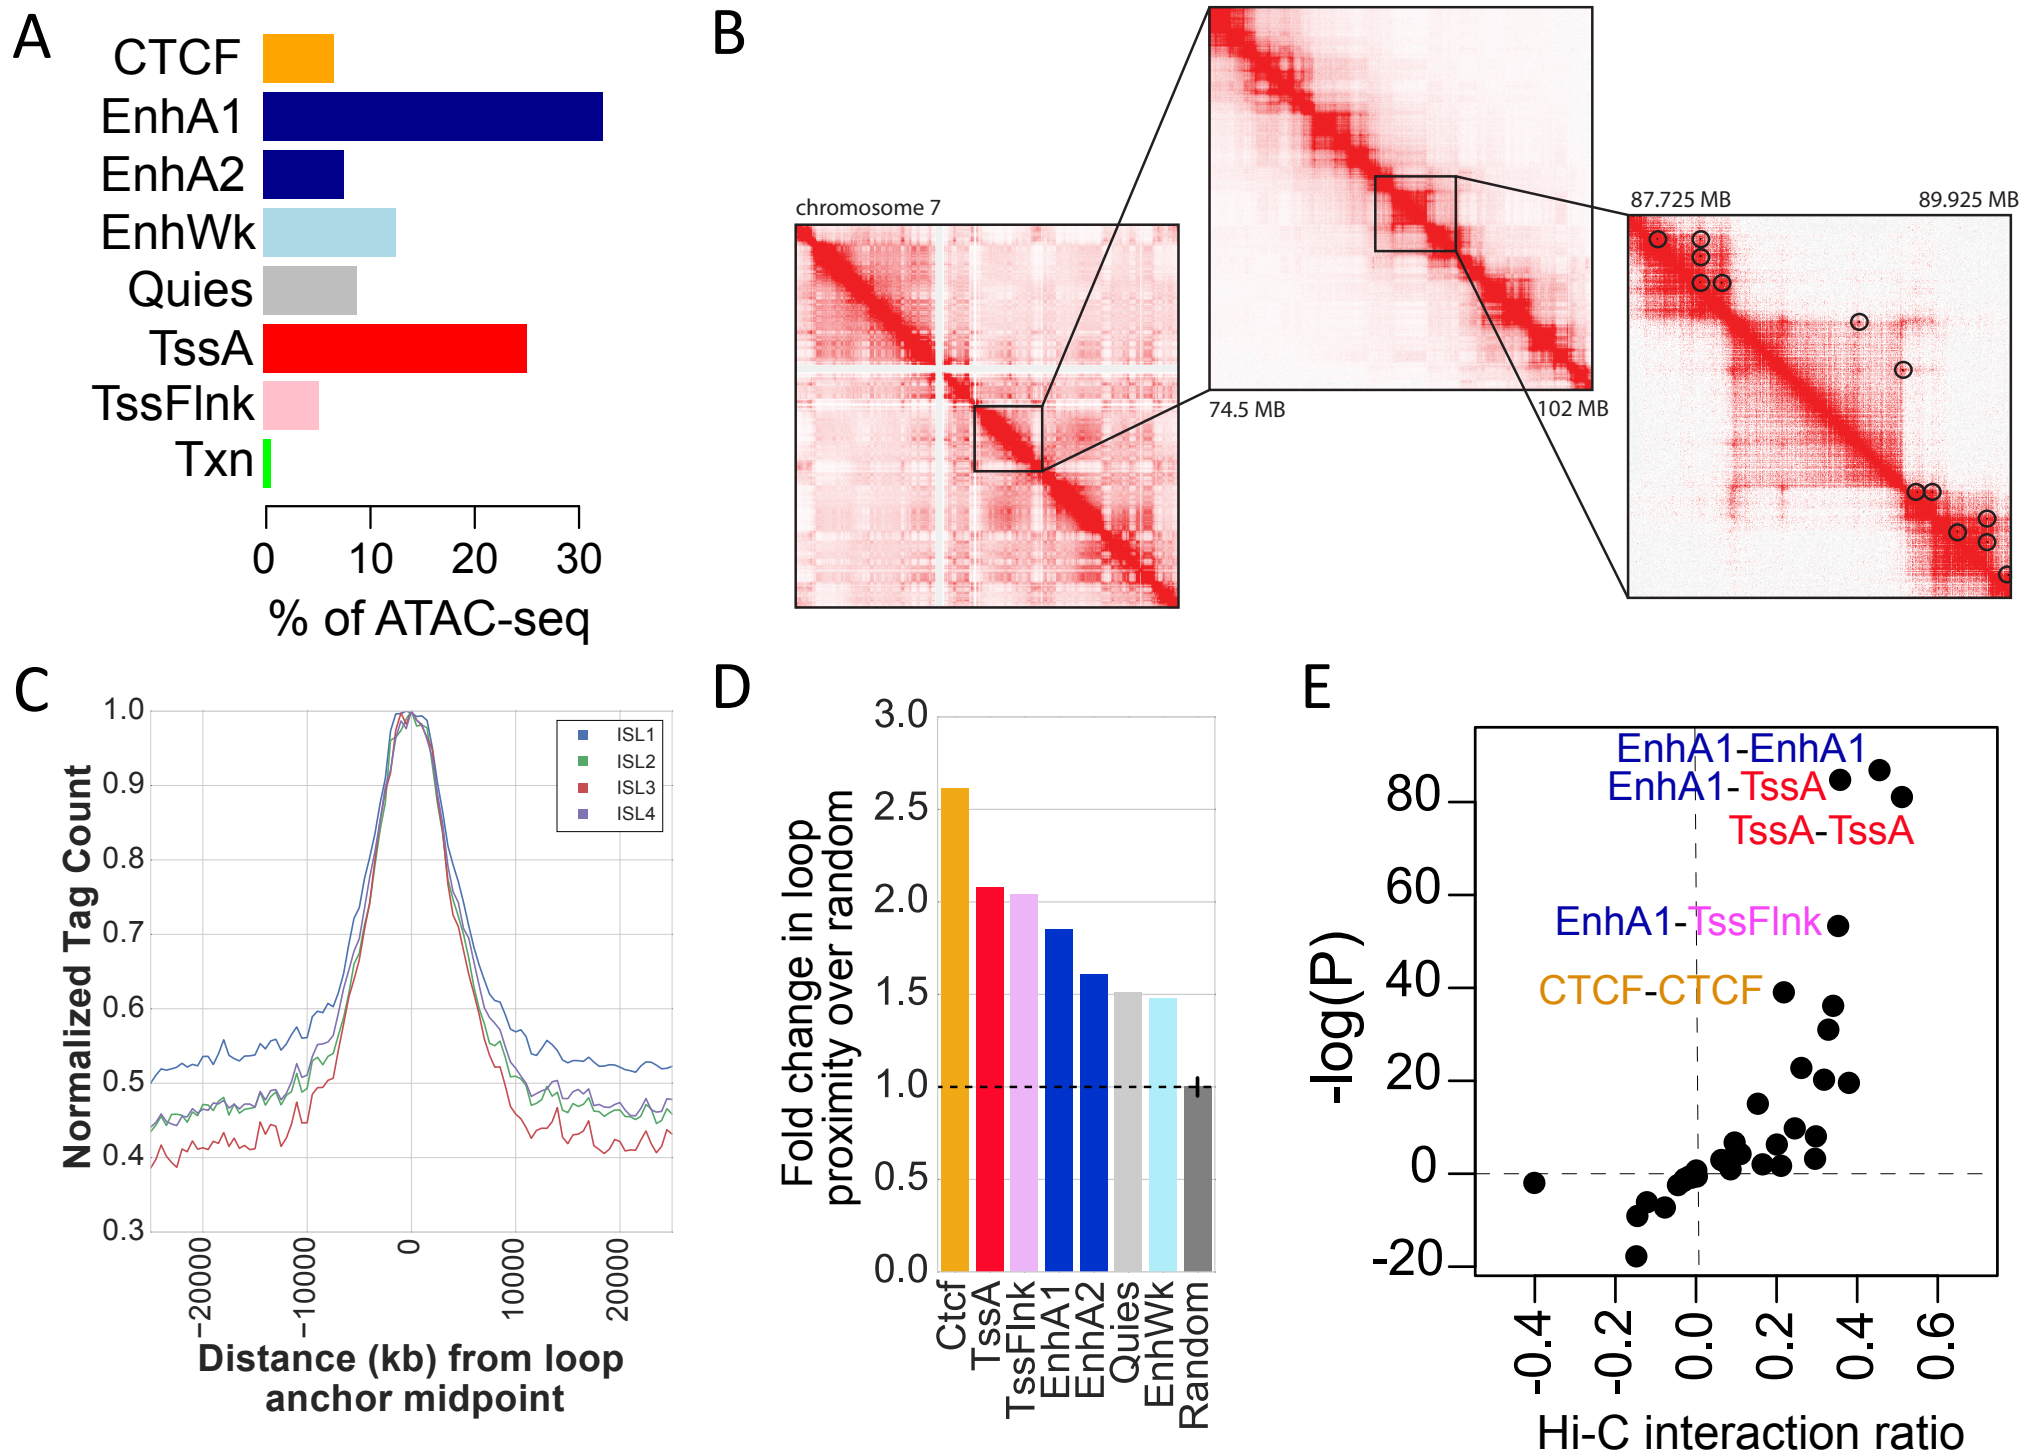

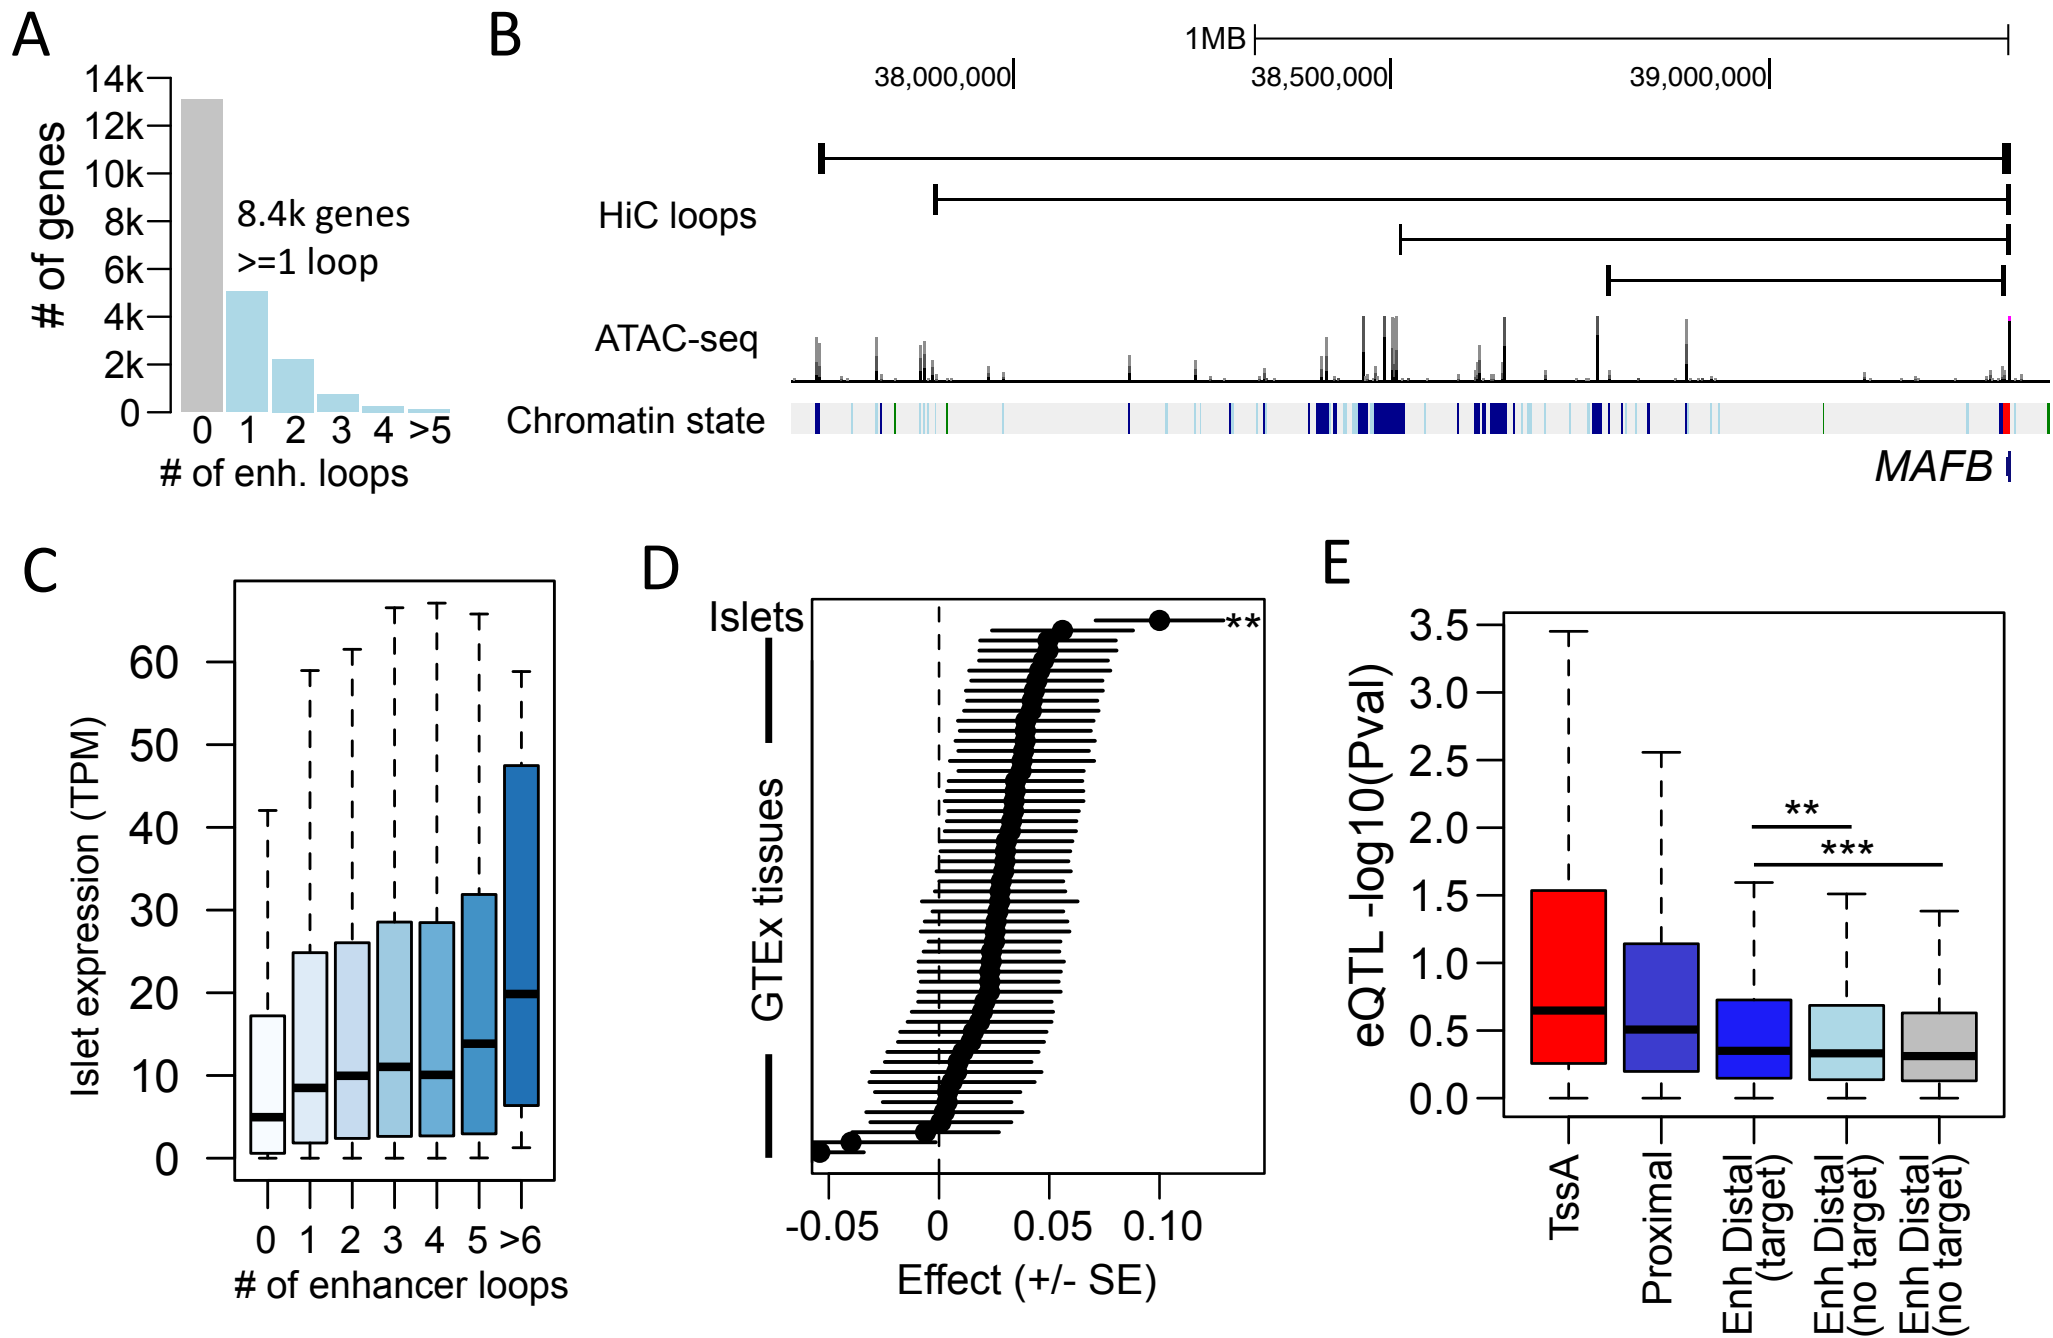

**Figure 2. Enhancer regulation of target gene expression in islets**

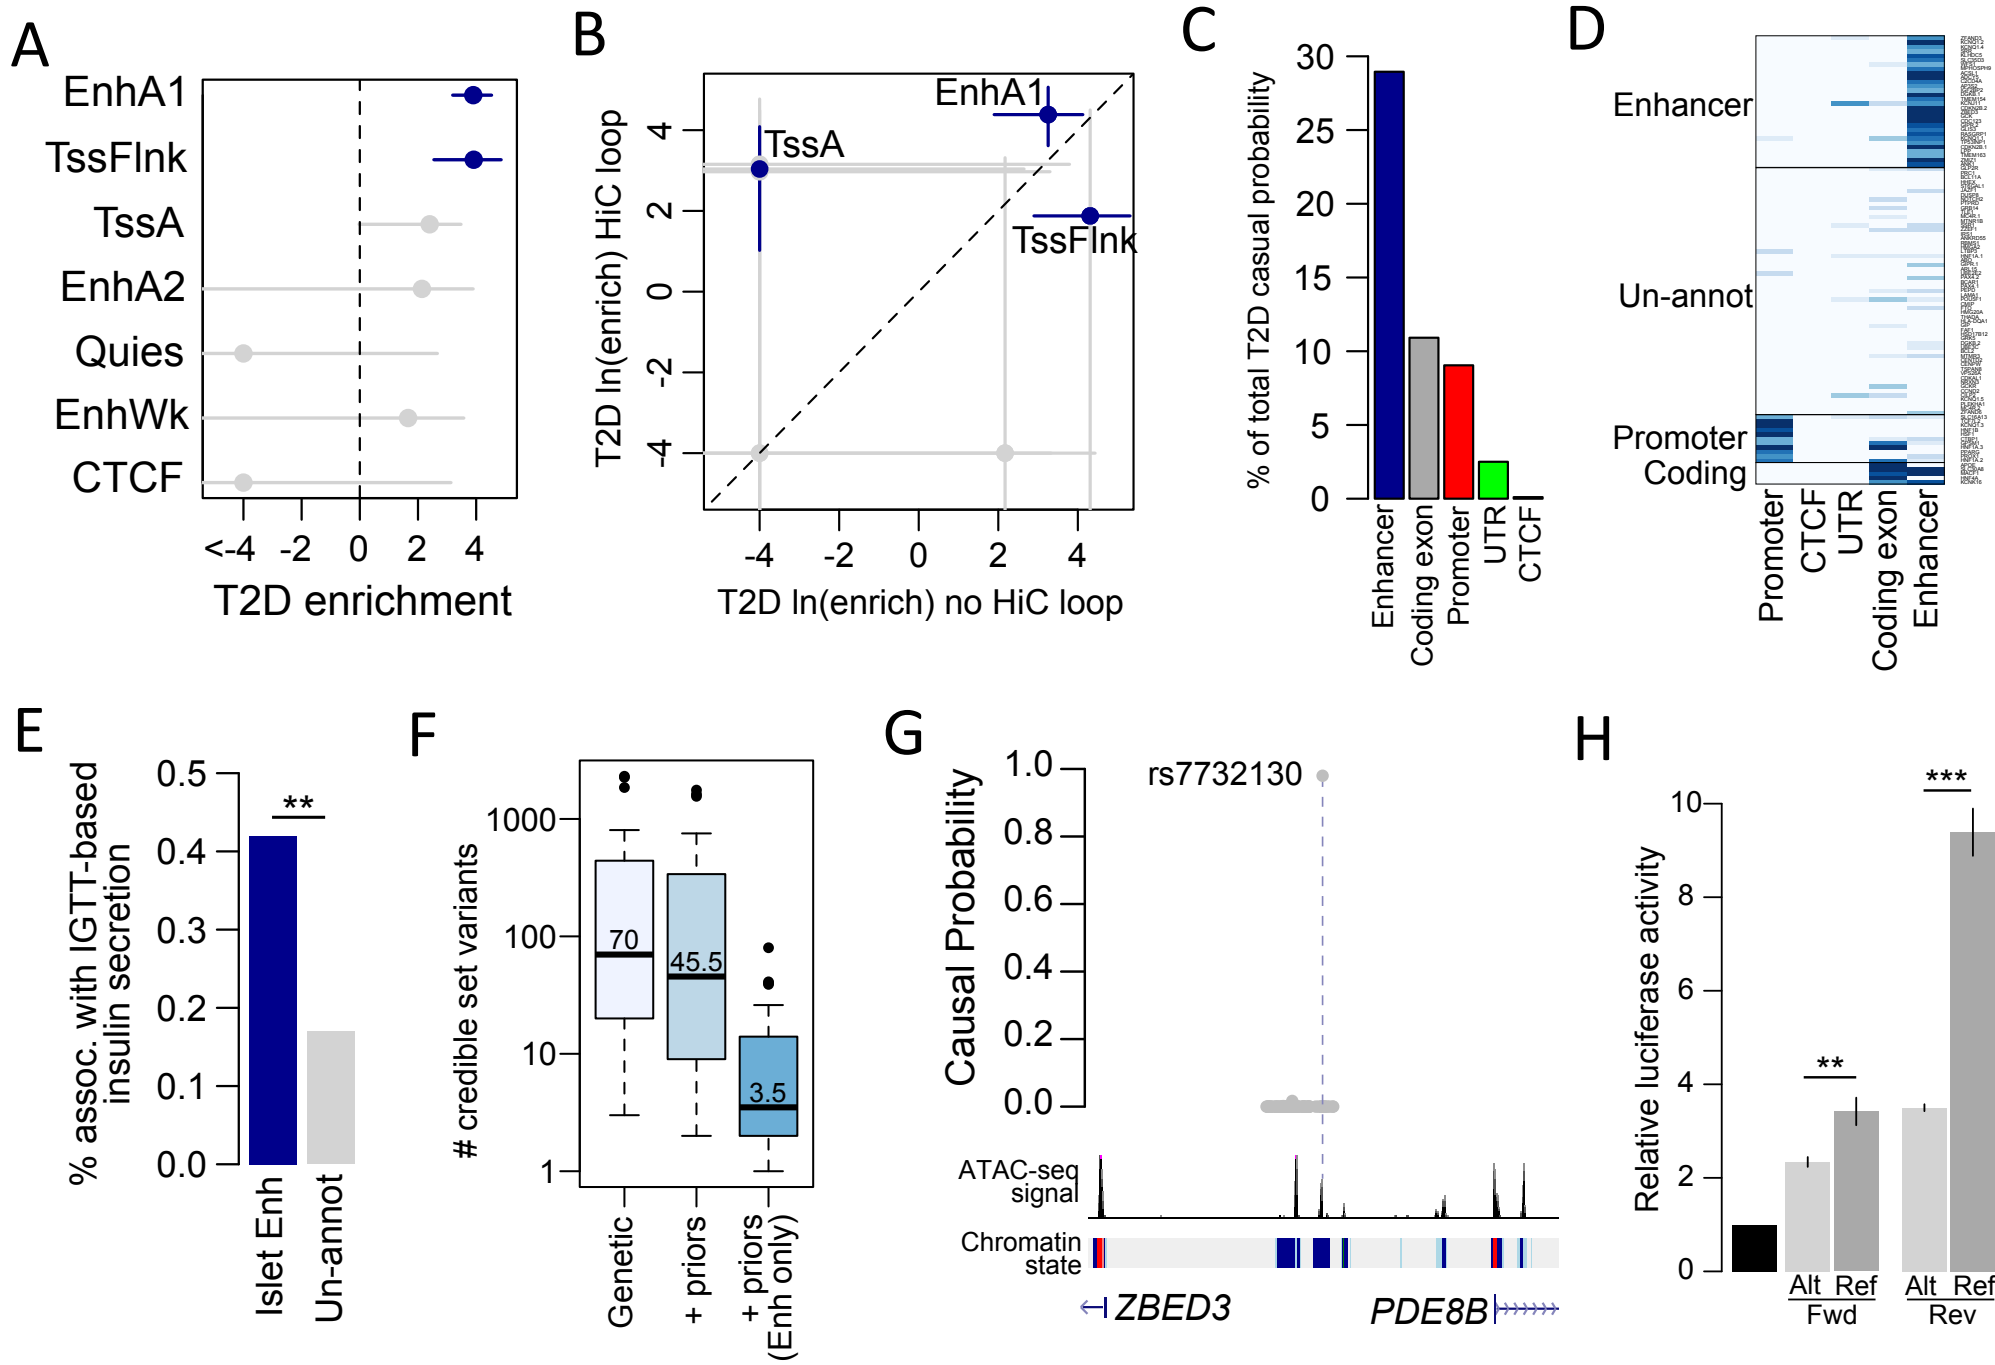

**Figure 3. Type 2 diabetes risk signals map in islet enhancers**

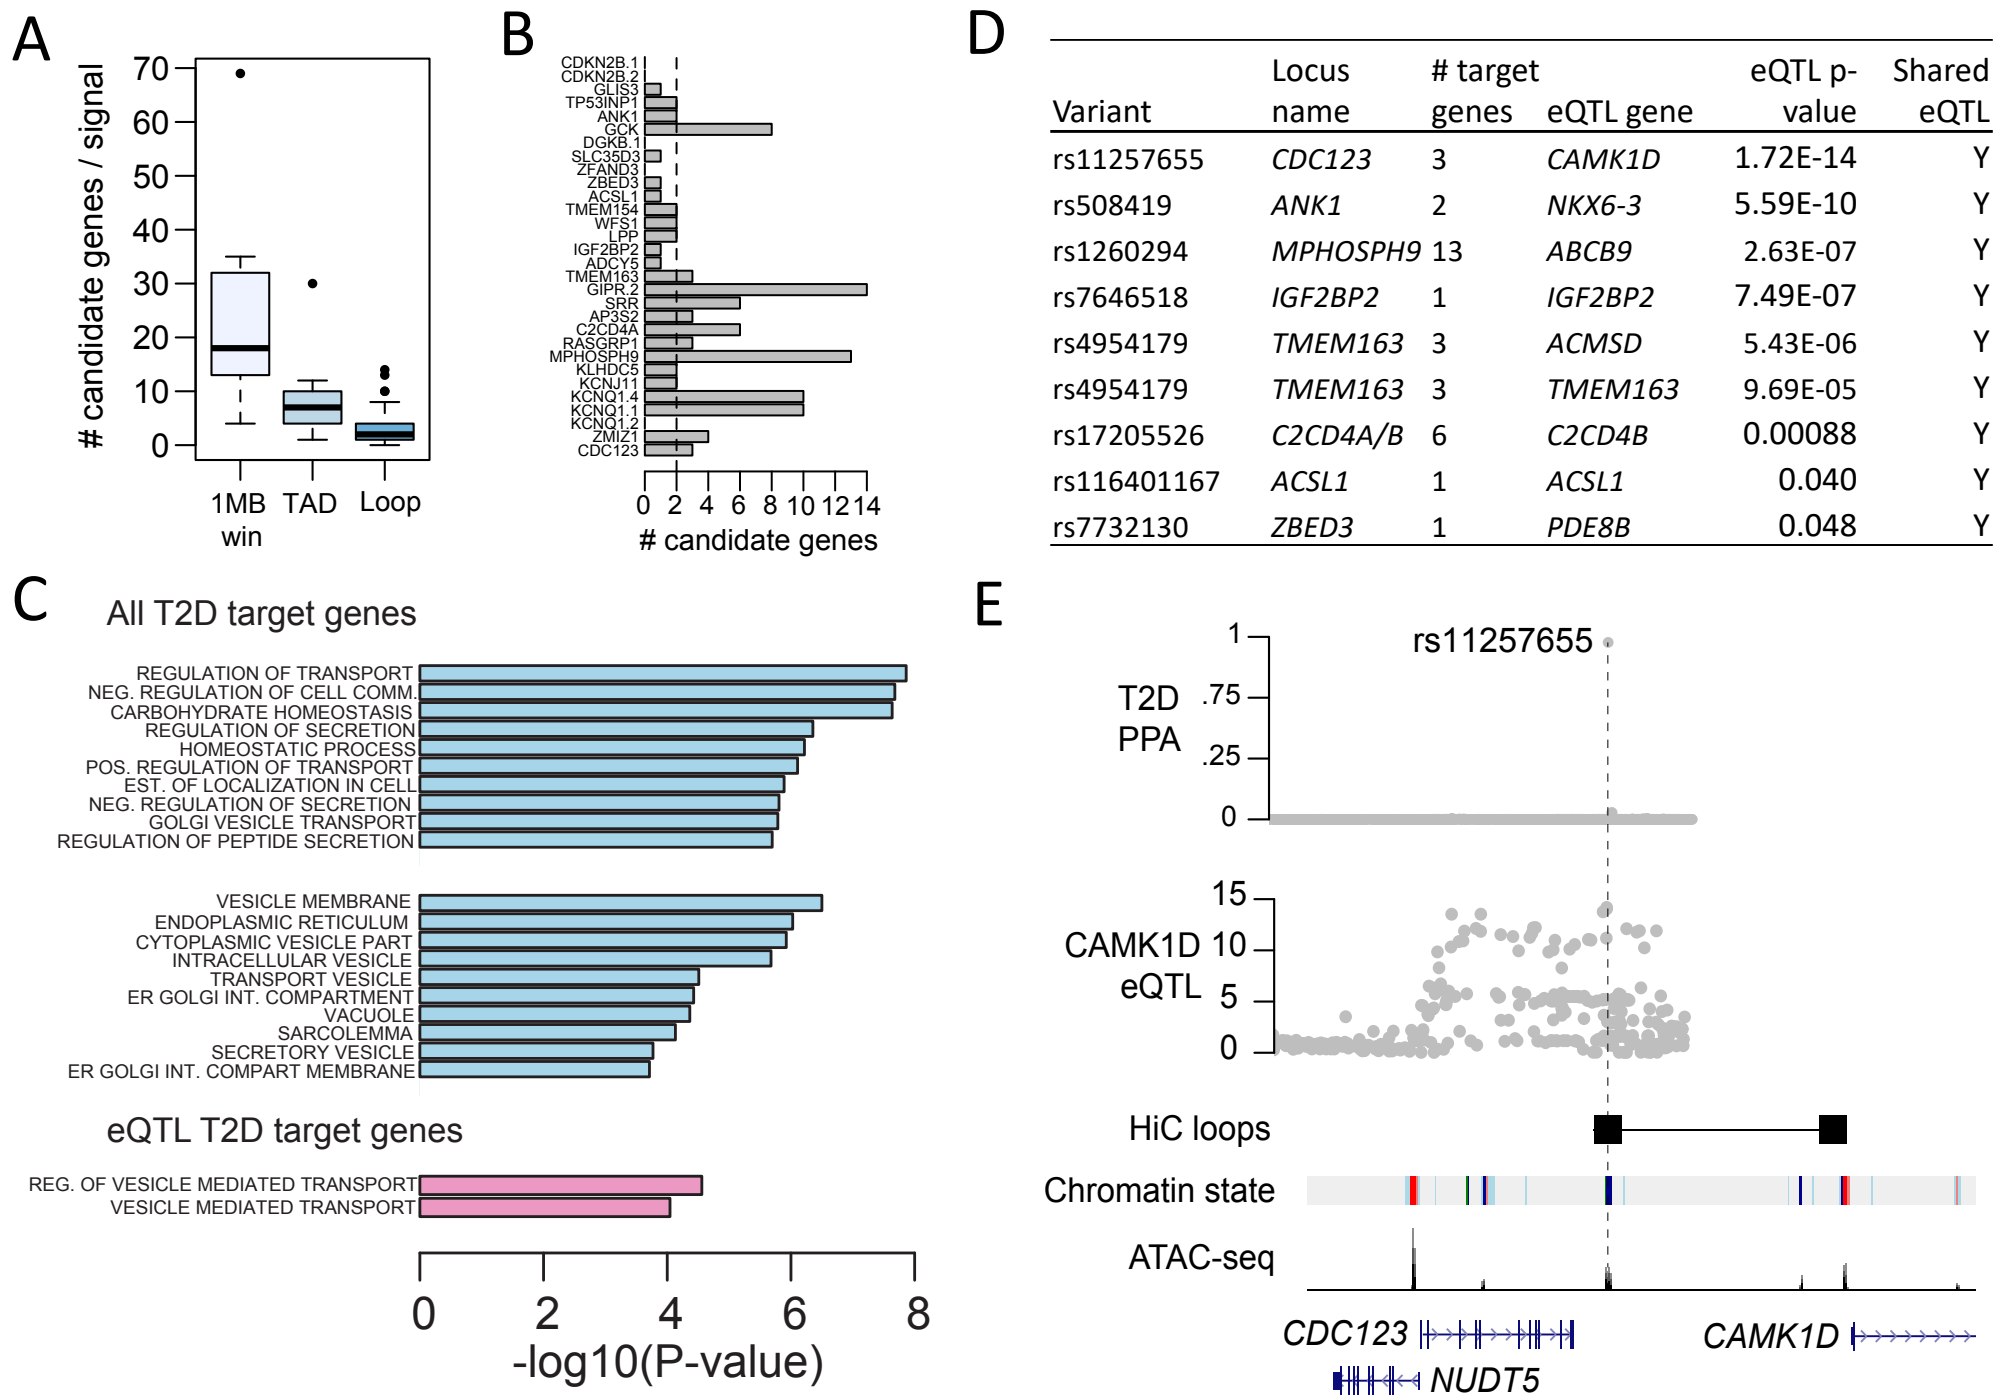

**Figure 4. Target genes of type 2 diabetes islet enhancer signals**

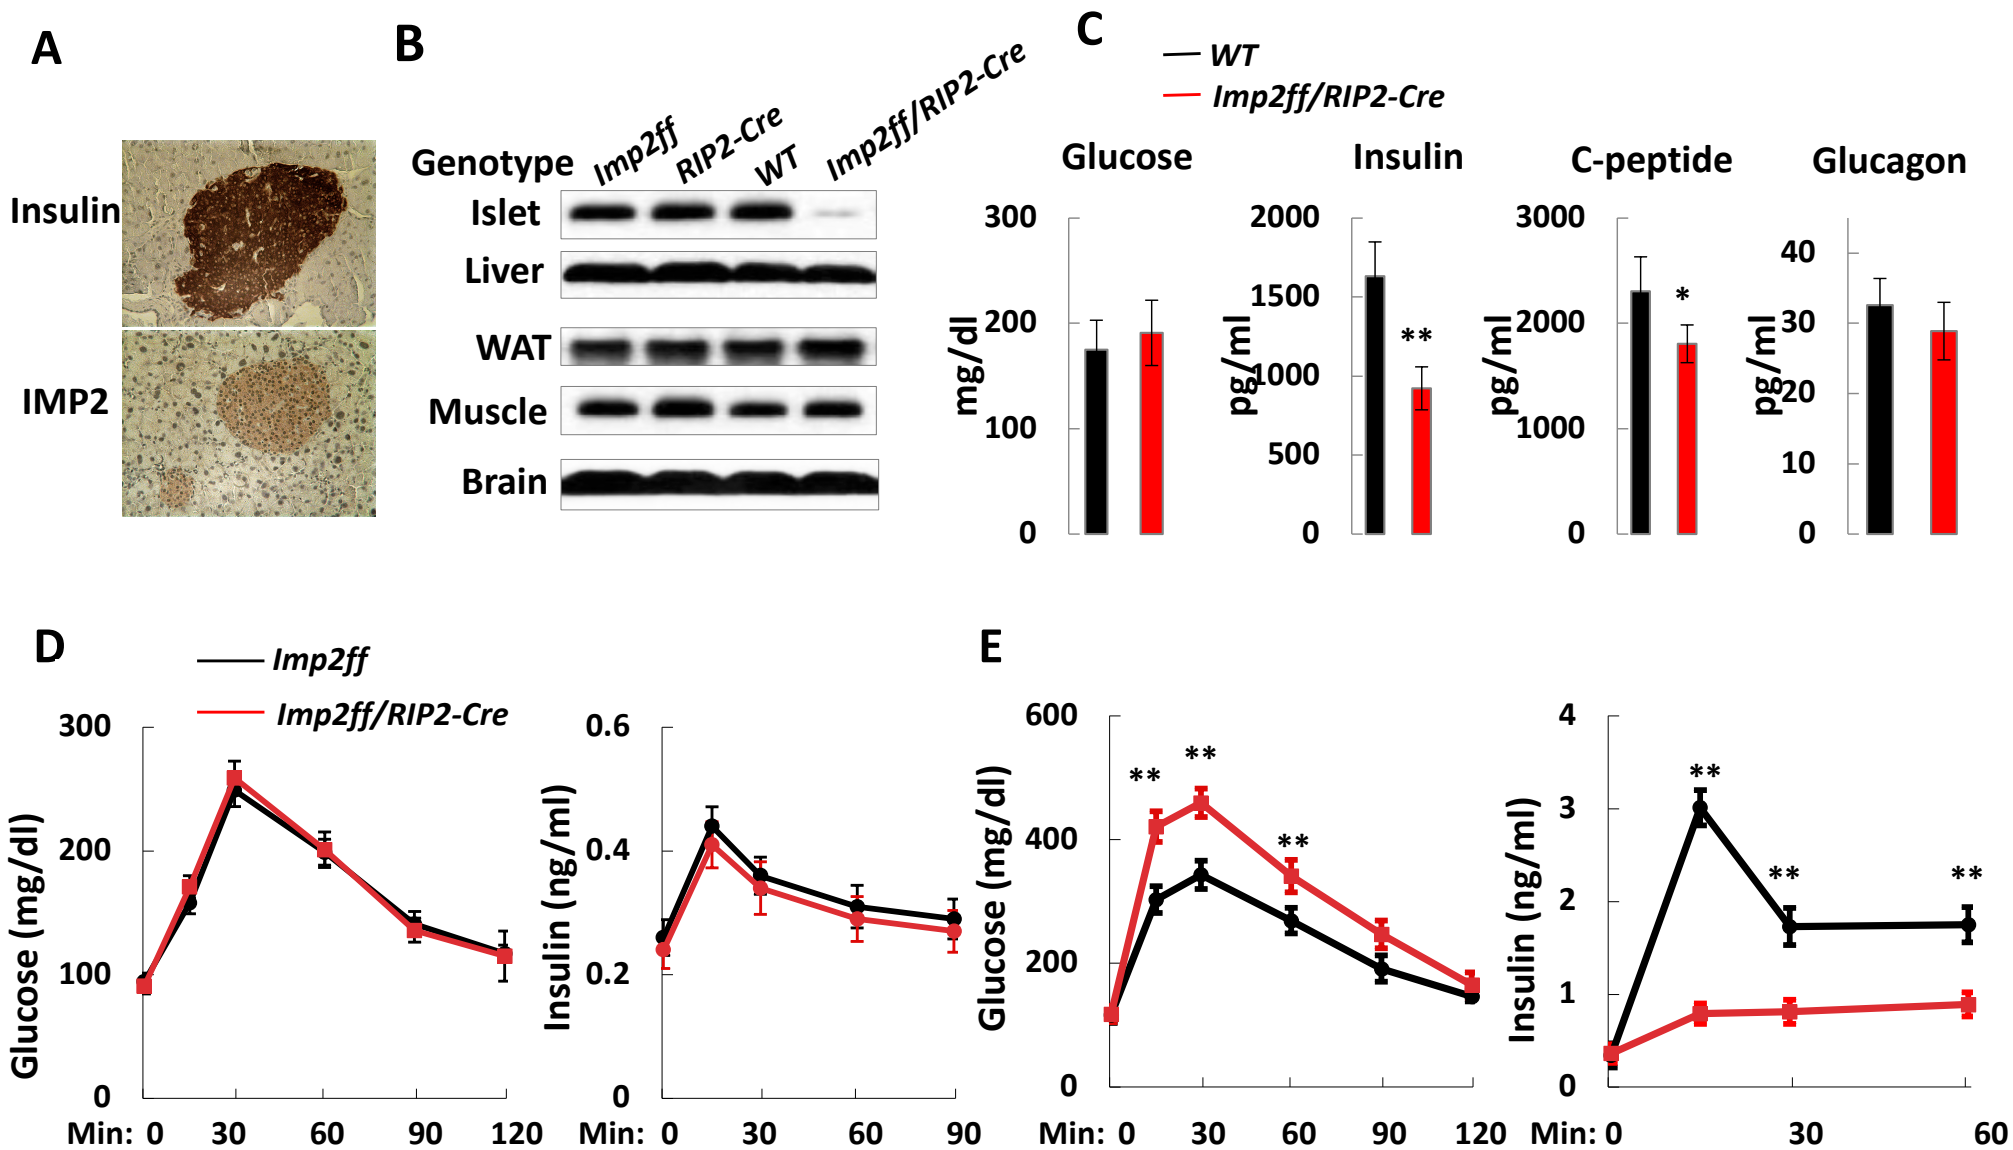

**Figure 5. Reduced *IGF2BP2* activity in mouse islets impairs glucose-stimulated insulin secretion in diet-induced insulin resistance**

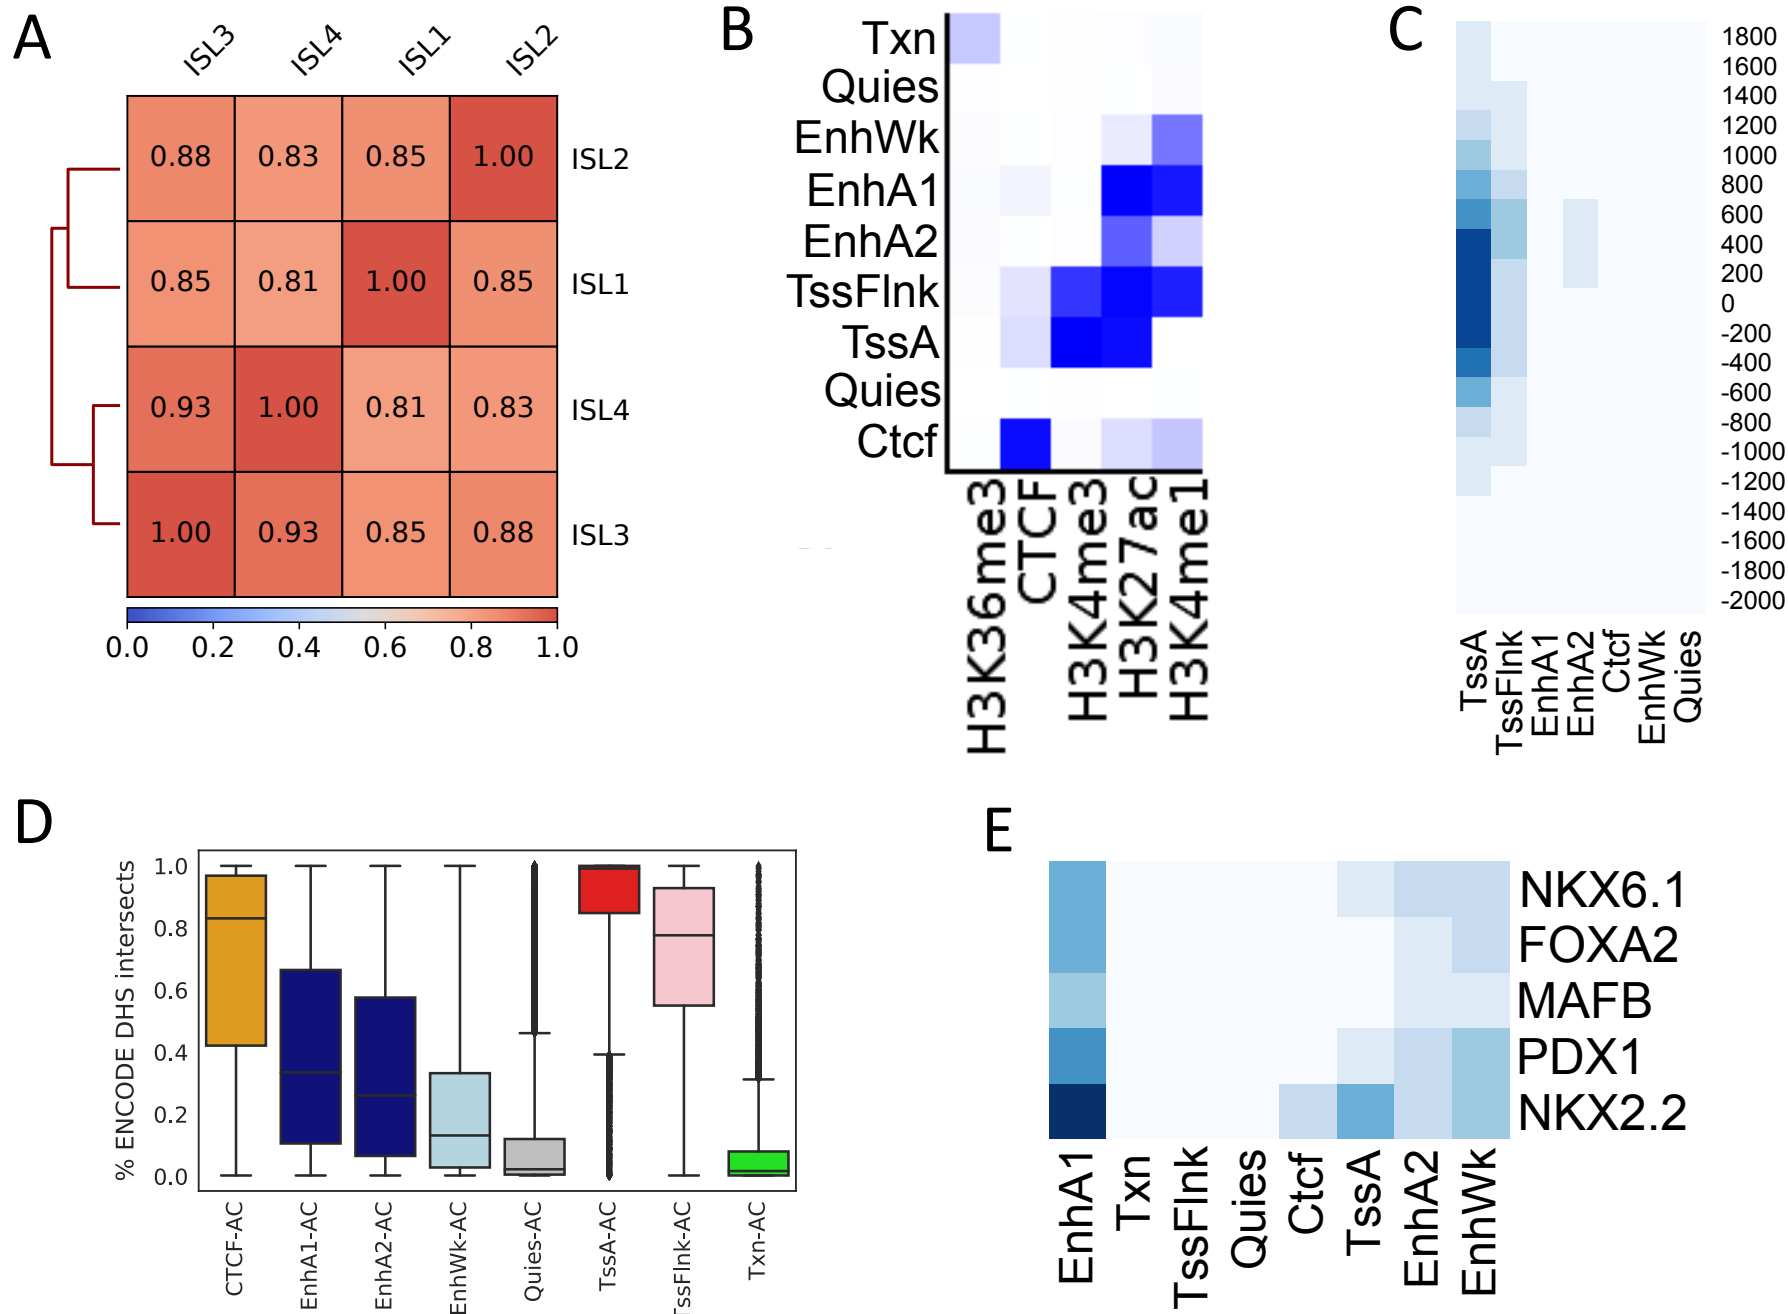

**Figure S1. Characteristics of pancreatic islet regulatory elements**



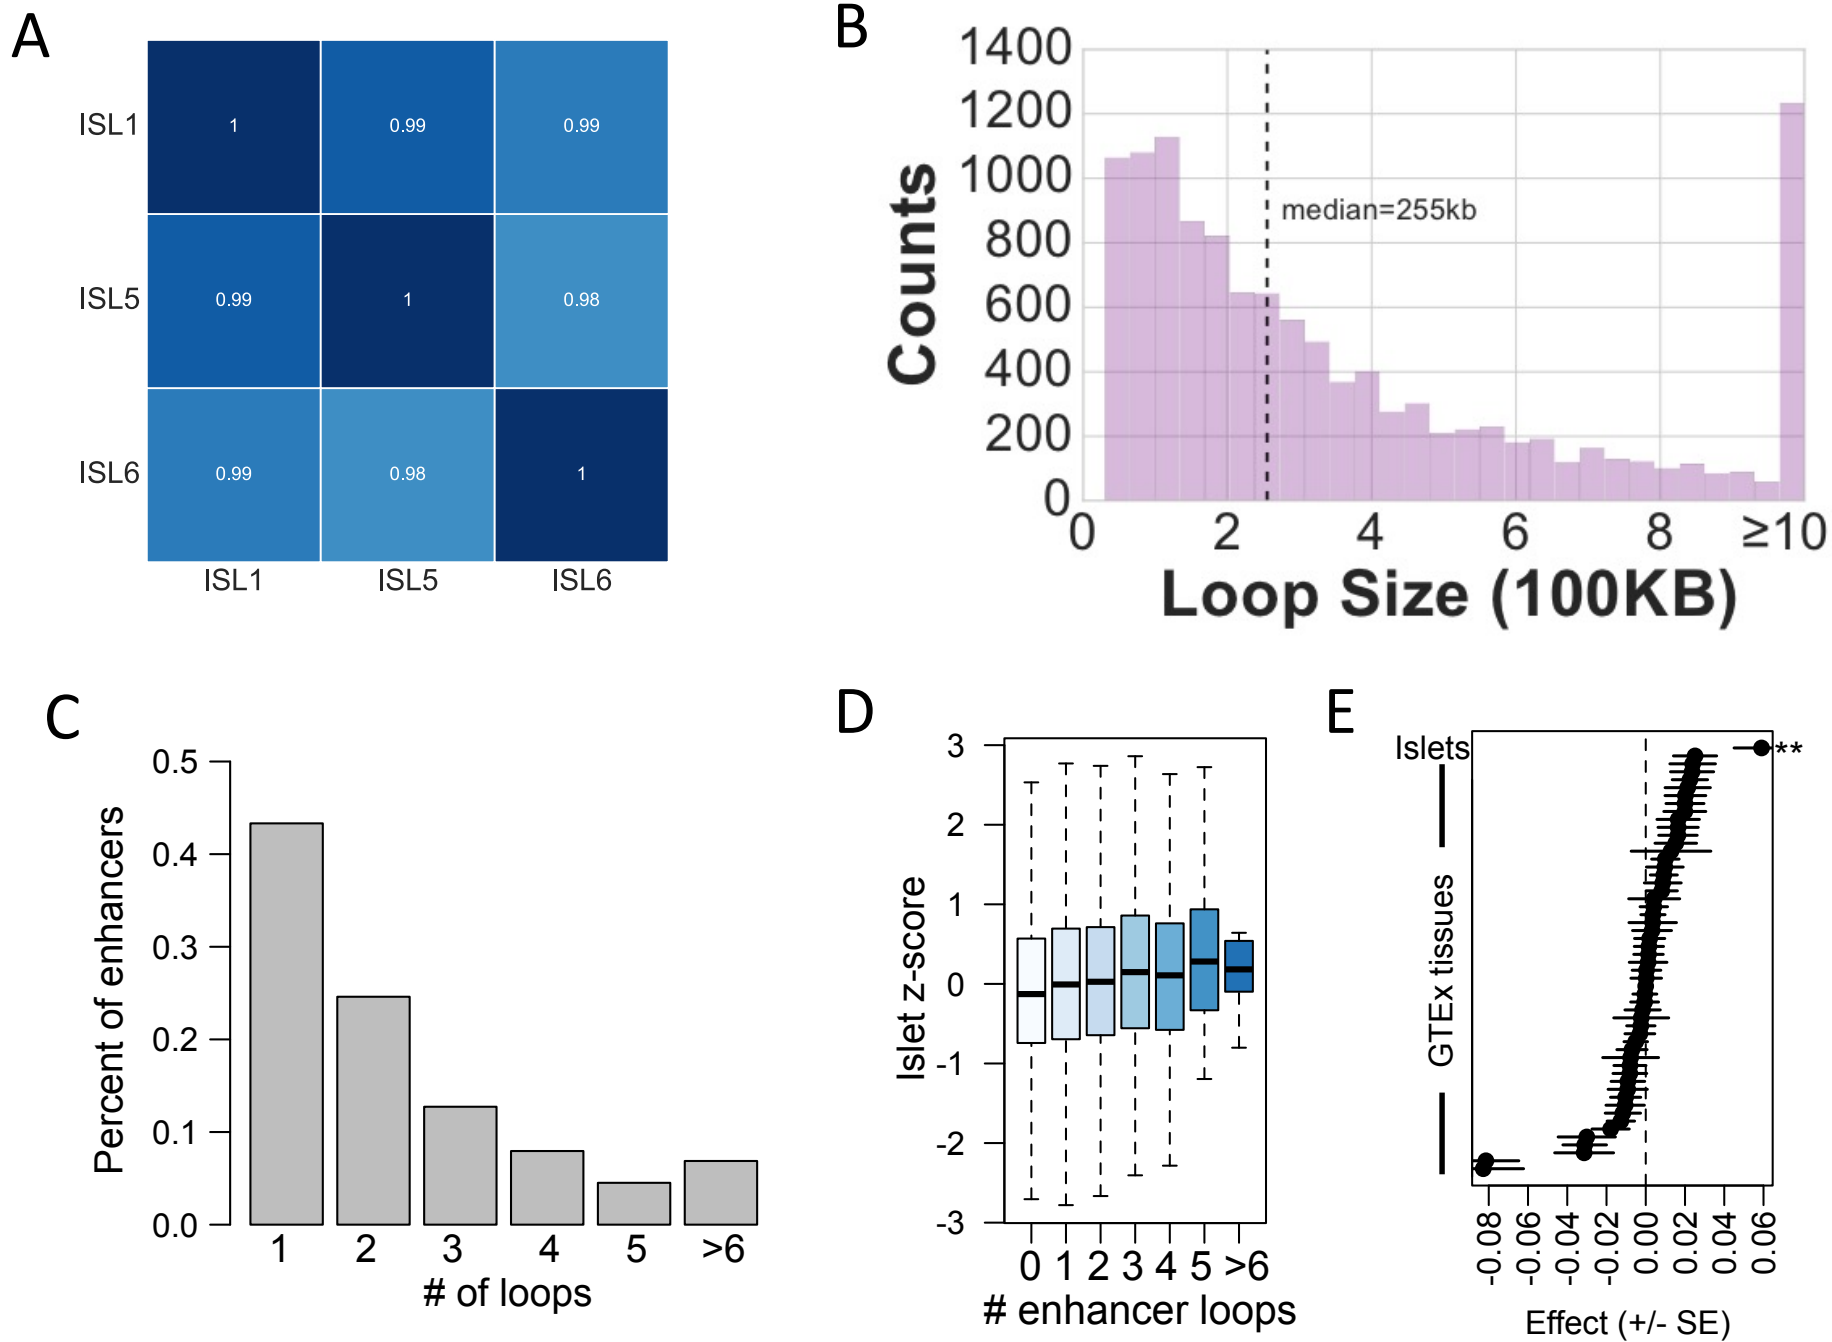

**Figure S2. Characteristics of pancreatic islet chromatin loops**

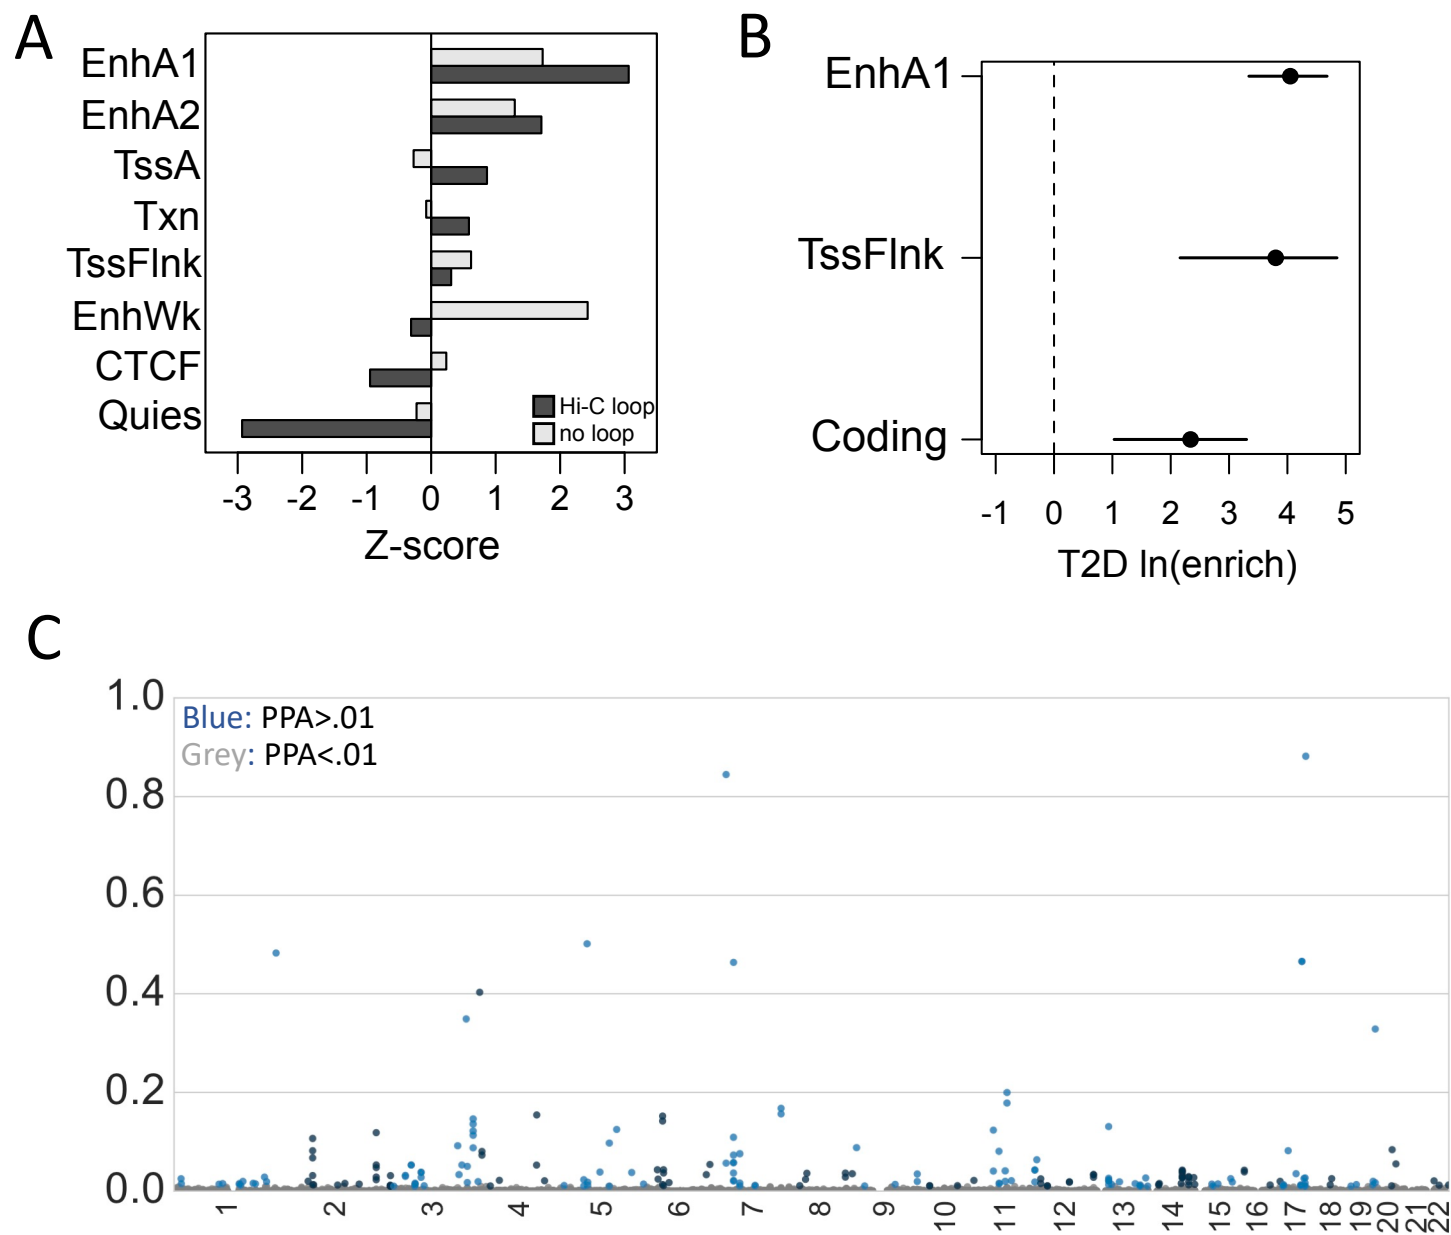

**Figure S3. Effects of variants in pancreatic islet regulatory elements on T2D risk**

# KCNQ1 locus

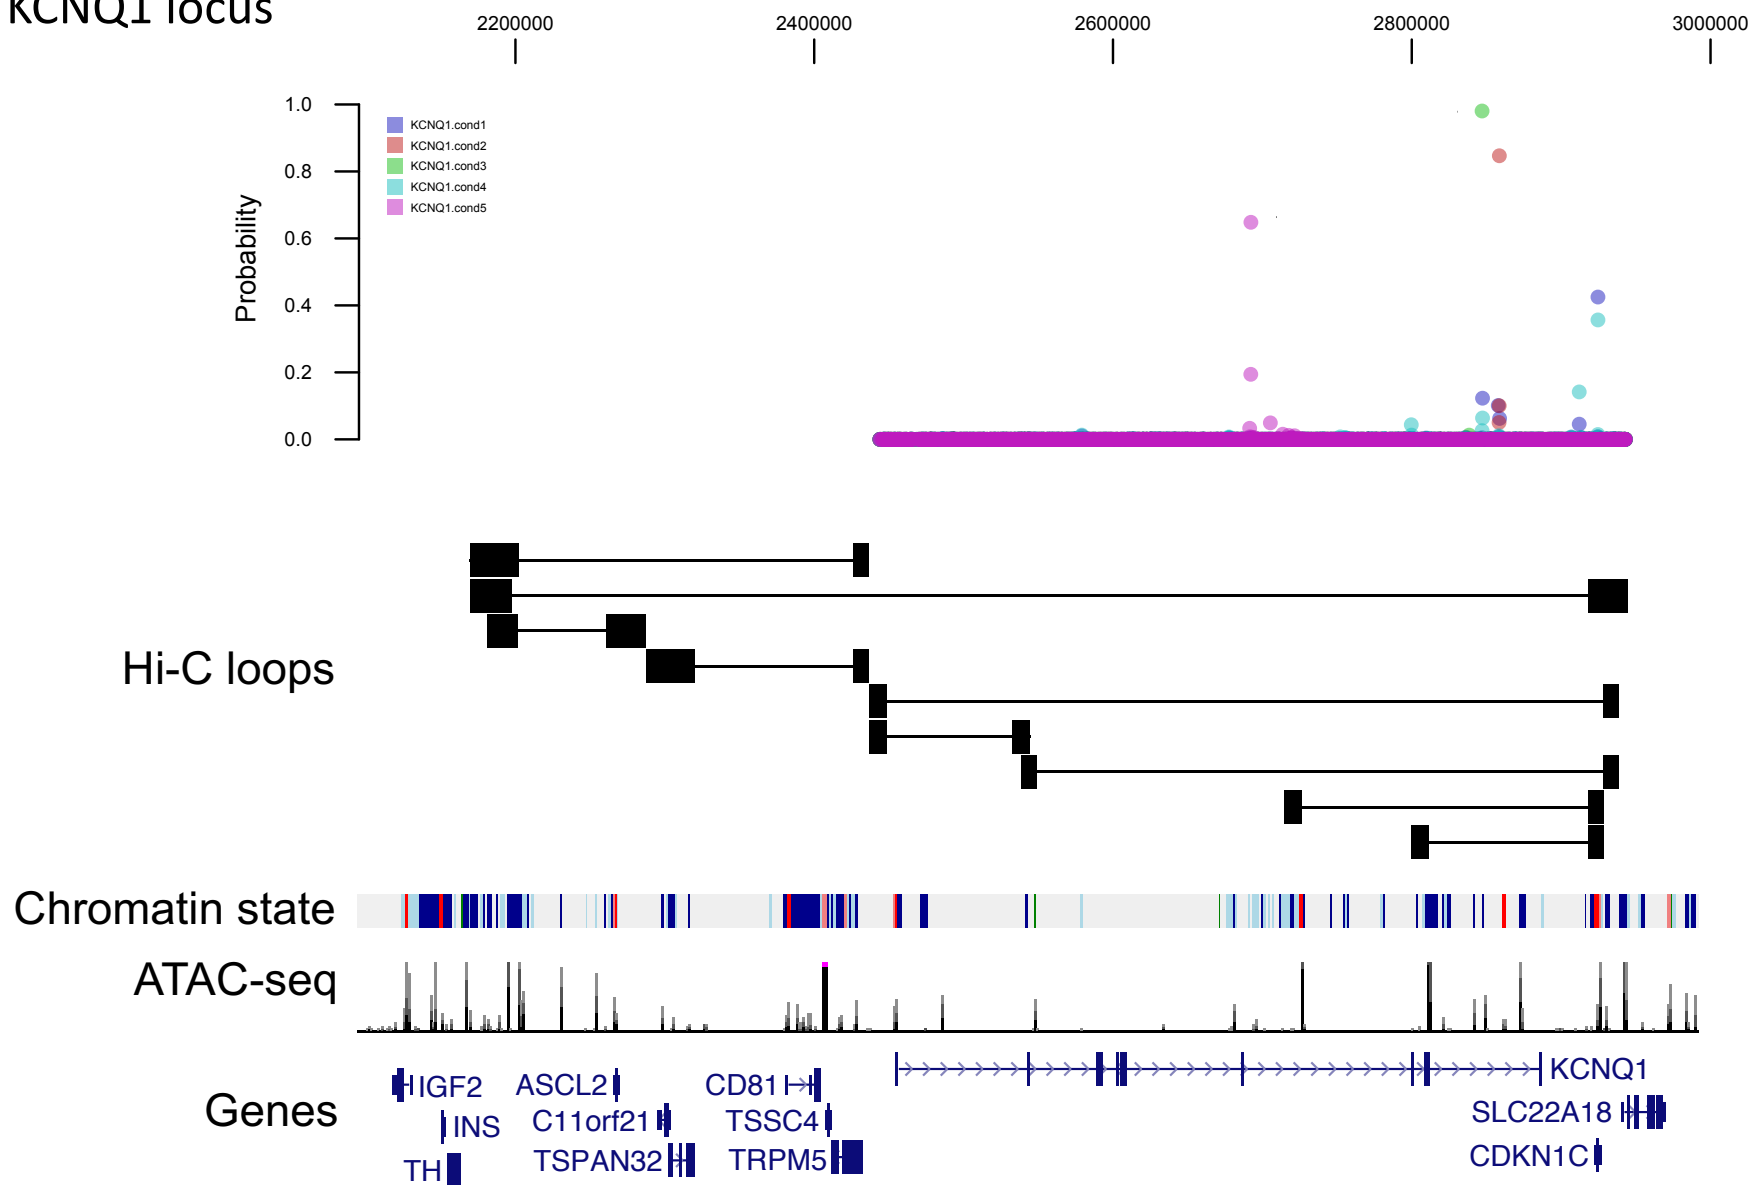

**Figure S4. T2D enhancer signal chromatin loops to candidate target genes**

# ZMIZ1 locus

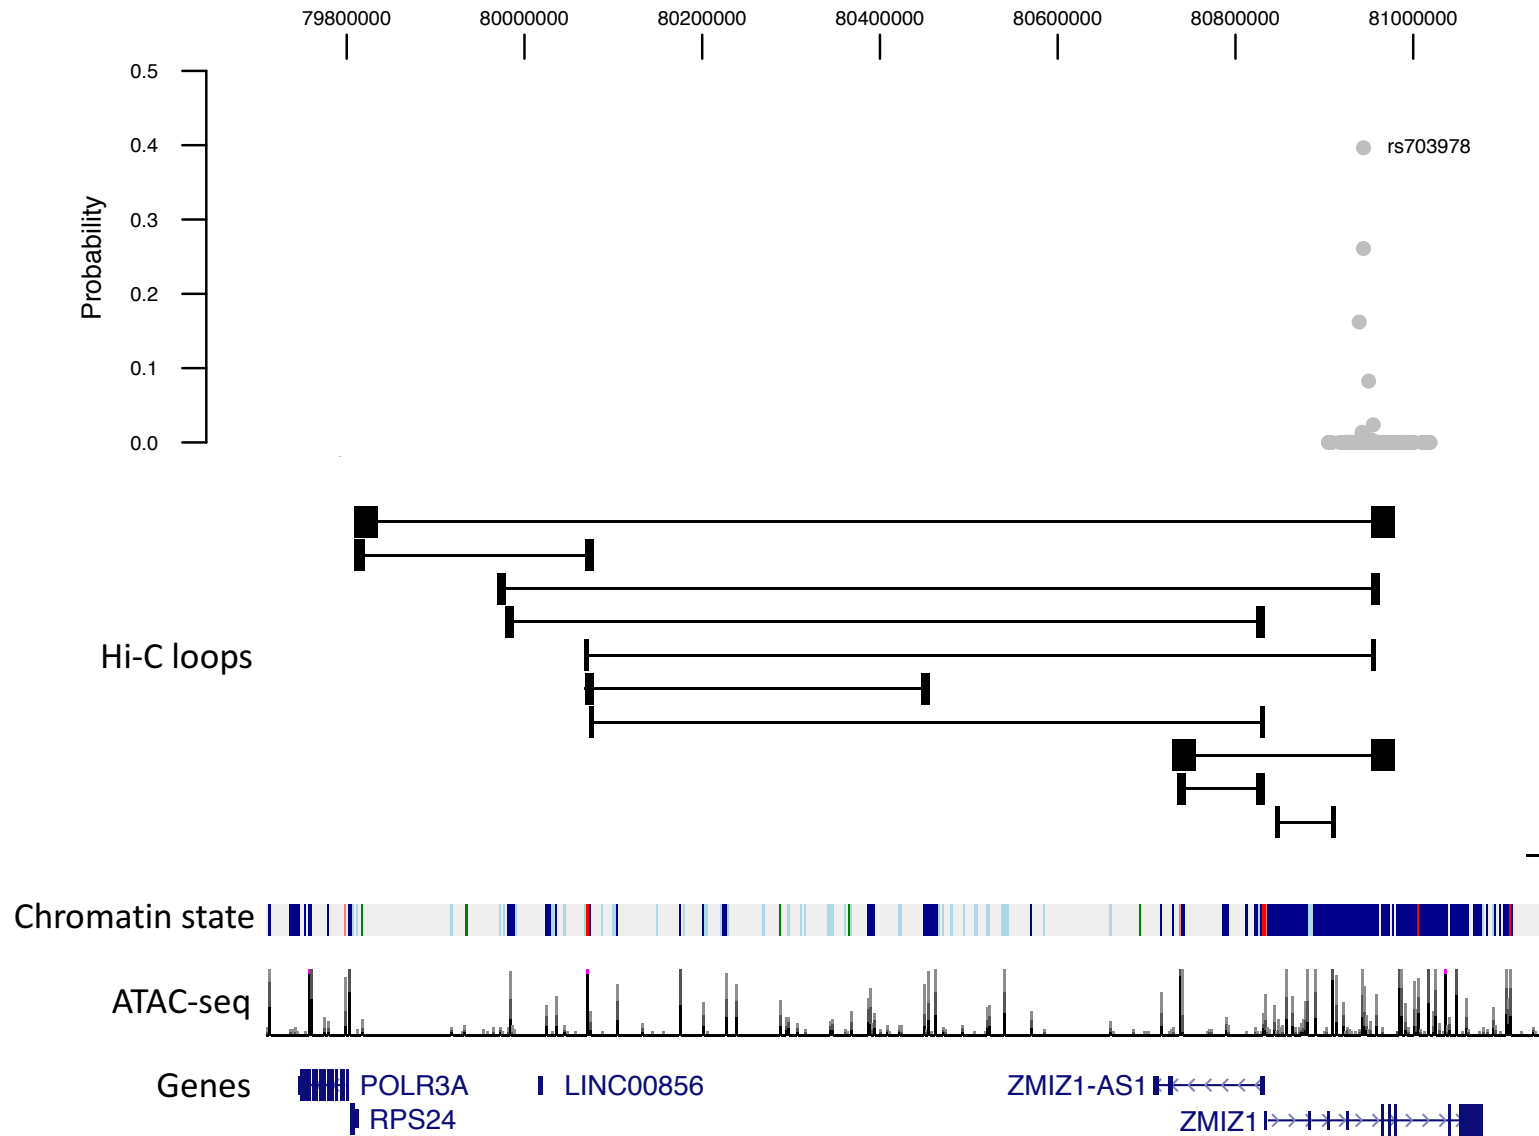

**Figure S4. T2D enhancer signal chromatin loops to candidate target genes**

# KCNJ11 locus

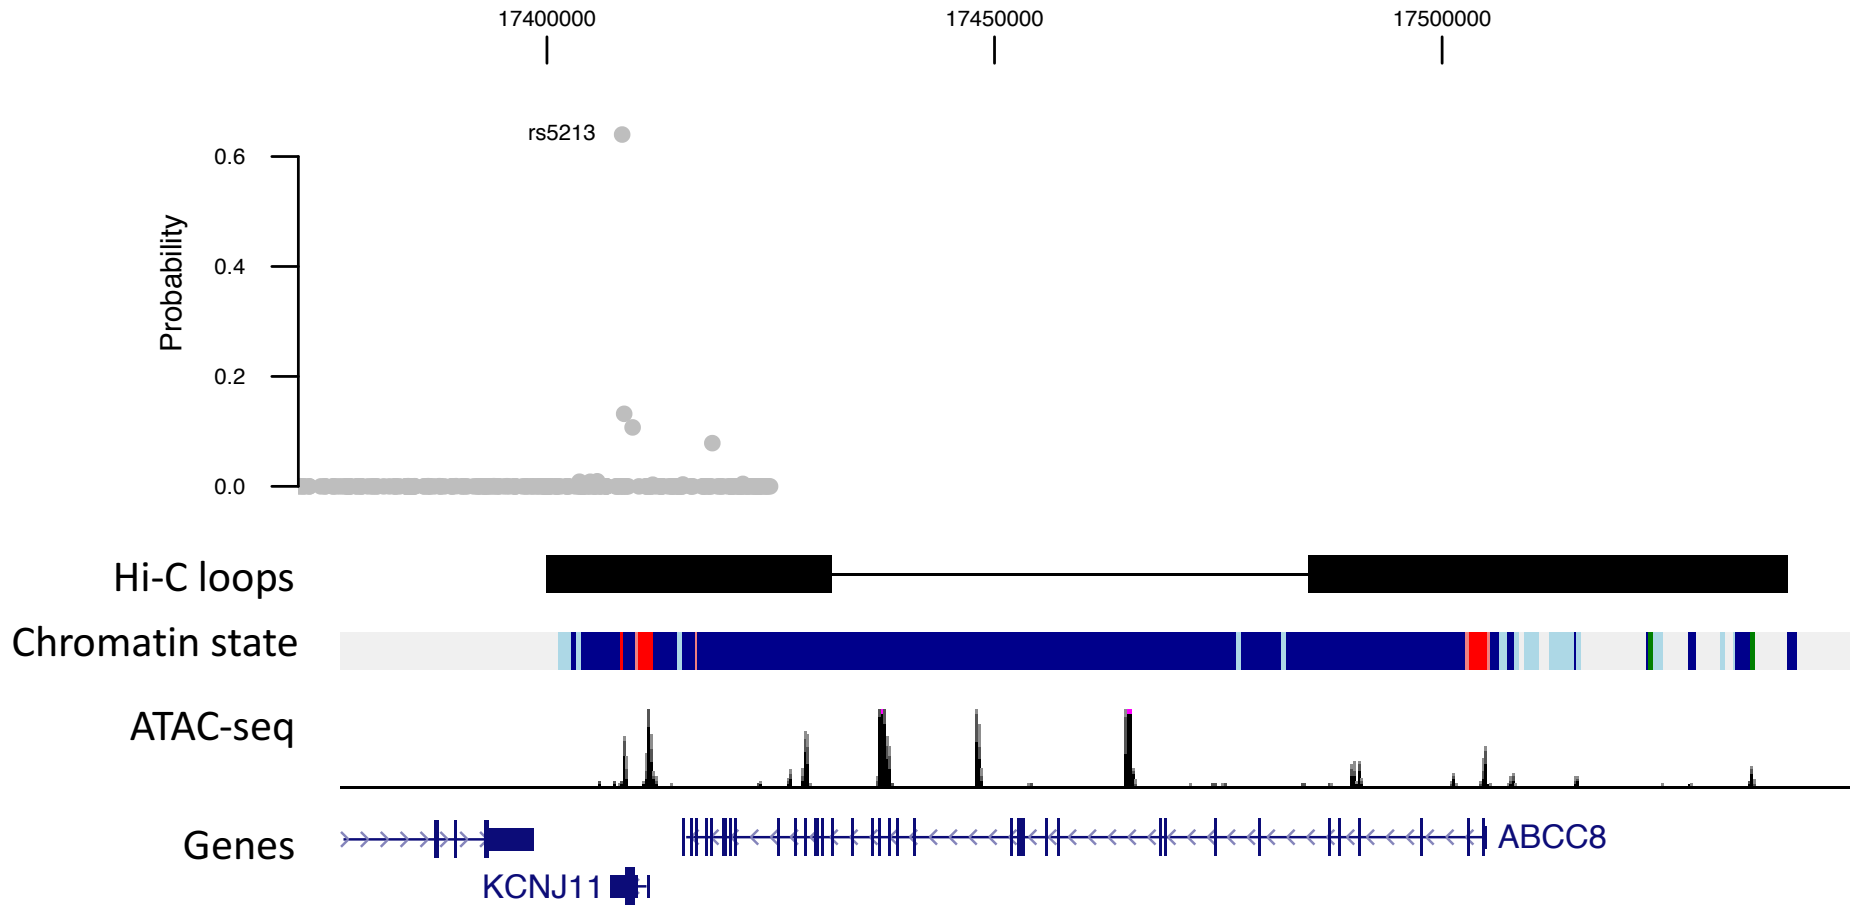

**Figure S4. T2D enhancer signal chromatin loops to candidate target genes**

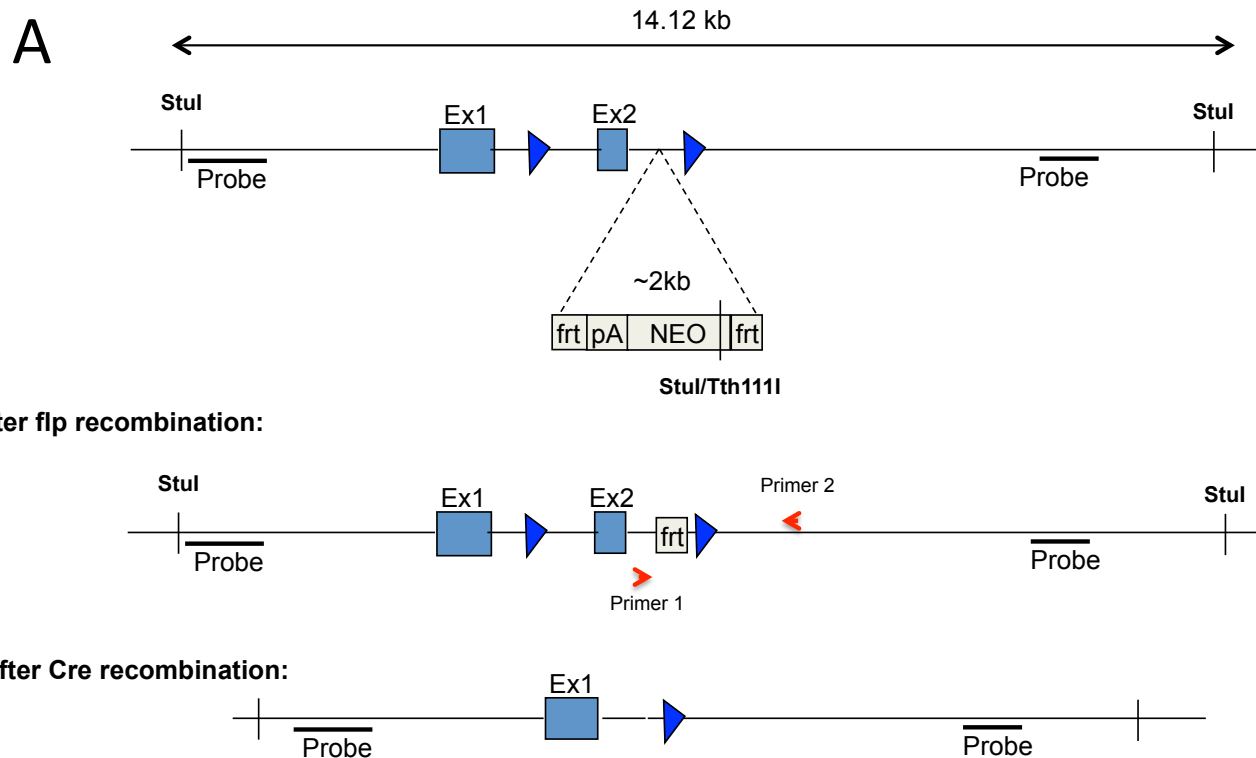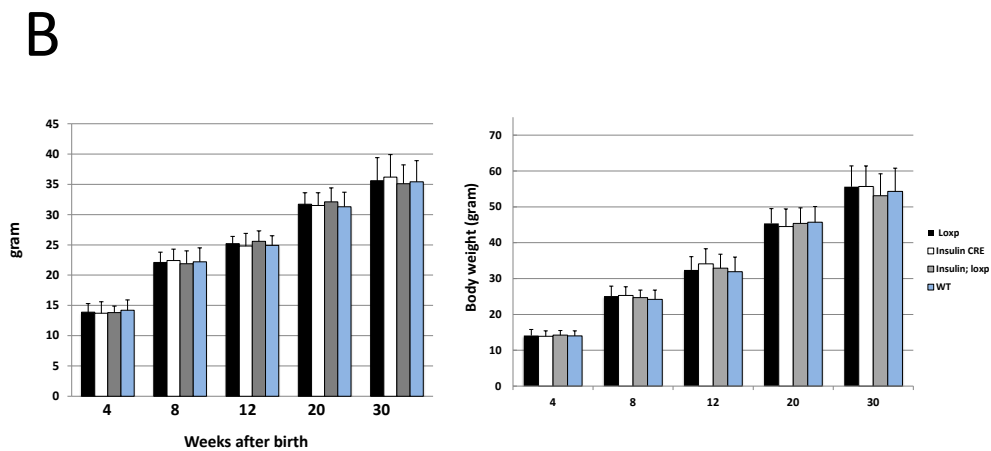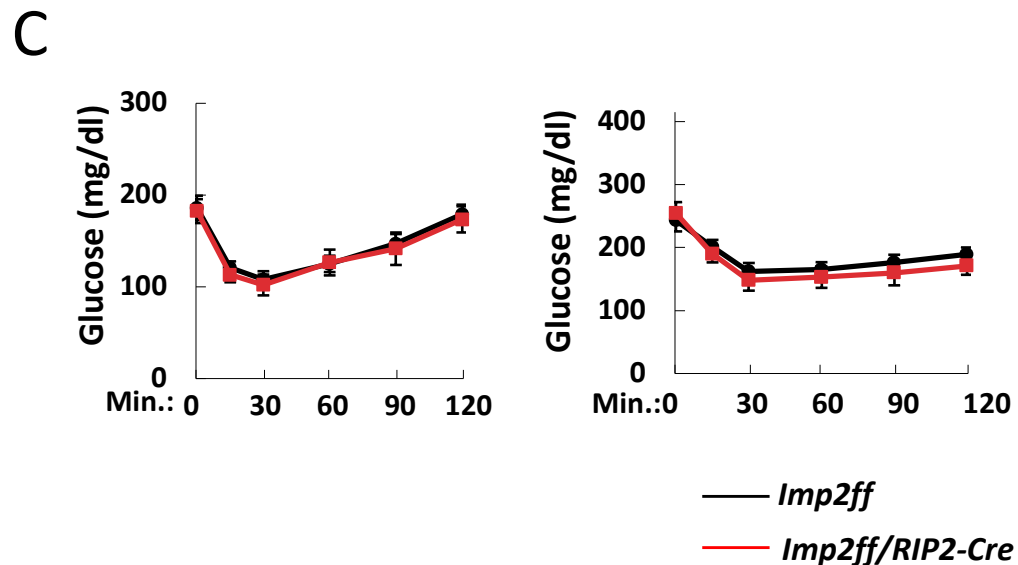

**Figure S5. Characteristics of beta cell IMP2 mouse model**
